RESEARCH ARTICLE

# The RhIR quorum-sensing receptor controls *Pseudomonas aeruginosa* pathogenesis and biofilm development independently of its canonical homoserine lactone autoinducer

Sampriti Mukherjee<sup>1</sup>, Dina Moustafa<sup>2</sup>, Chari D. Smith<sup>1</sup>, Joanna B. Goldberg<sup>2</sup>, Bonnie L. Bassler<sup>1,3\*</sup>

**1** Princeton University, Department of Molecular Biology, Princeton, NJ, United States of America, **2** Emory University School of Medicine, Children's Healthcare of Atlanta, Inc., Department of Pediatrics, and Center for Cystic Fibrosis and Airway Diseases Research, Atlanta, GA, United States of America, **3** Howard Hughes Medical Institute, Chevy Chase, MD, United States of America

\* [bbassler@princeton.edu](mailto:bbassler@princeton.edu)

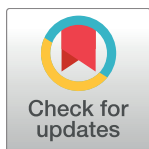

**OPEN ACCESS**

**Citation:** Mukherjee S, Moustafa D, Smith CD, Goldberg JB, Bassler BL (2017) The RhIR quorum-sensing receptor controls *Pseudomonas aeruginosa* pathogenesis and biofilm development independently of its canonical homoserine lactone autoinducer. PLoS Pathog 13(7): e1006504. <https://doi.org/10.1371/journal.ppat.1006504>

**Editor:** Vincent T. Lee, University of Maryland, UNITED STATES

**Received:** May 4, 2017

**Accepted:** July 1, 2017

**Published:** July 17, 2017

**Copyright:** © 2017 Mukherjee et al. This is an open access article distributed under the terms of the [Creative Commons Attribution License](https://creativecommons.org/licenses/by/4.0/), which permits unrestricted use, distribution, and reproduction in any medium, provided the original author and source are credited.

**Data Availability Statement:** All relevant data are within the paper and its Supporting Information files.

**Funding:** This work was supported by the Howard Hughes Medical Institute, NIH Grant 2R37GM065859, and National Science foundation Grant MCB-0948112 to BLB, and a Life Science Research Foundation Postdoctoral Fellowship through the Gordon and Betty Moore Foundation through Grant GBMF2550.06 to SM. The funders

## Abstract

Quorum sensing (QS) is a bacterial cell-to-cell communication process that relies on the production, release, and response to extracellular signaling molecules called autoinducers. QS controls virulence and biofilm formation in the human pathogen *Pseudomonas aeruginosa*. *P. aeruginosa* possesses two canonical LuxI/R-type QS systems, LasI/R and RhII/R, which produce and detect 3OC12-homoserine lactone and C4-homoserine lactone, respectively. Here, we use biofilm analyses, reporter assays, RNA-seq studies, and animal infection assays to show that RhIR directs both RhII-dependent and RhII-independent regulons. In the absence of RhII, RhIR controls the expression of genes required for biofilm formation as well as genes encoding virulence factors. Consistent with these findings,  $\Delta rhIR$  and  $\Delta rhII$  mutants have radically different biofilm phenotypes and the  $\Delta rhII$  mutant displays full virulence in animals whereas the  $\Delta rhIR$  mutant is attenuated. The  $\Delta rhII$  mutant cell-free culture fluids contain an activity that stimulates RhIR-dependent gene expression. We propose a model in which RhIR responds to an alternative ligand, in addition to its canonical C4-homoserine lactone autoinducer. This alternate ligand promotes a RhIR-dependent transcriptional program in the absence of RhII.

## Author summary

Quorum sensing (QS) is a cell-to-cell communication process that bacteria use to coordinate group behaviors. QS is essential for virulence and biofilm formation in many bacteria including the human pathogen *Pseudomonas aeruginosa*. *P. aeruginosa* has high clinical relevance because it has acquired resistance to commonly used antibiotics, and is a priority pathogen on the CDC ESKAPE pathogen list. The urgent need for new antimicrobials to combat *P. aeruginosa* infections makes targeting QS for interference an attractive approach. Here, we investigate *P. aeruginosa* under biofilm conditions that mimic authentic

had no role in study design, data collection and analysis, decision to publish, or preparation of the manuscript.

**Competing interests:** The authors have declared that no competing interests exist.

*P. aeruginosa* lifestyles in environmental and medical contexts rather than in traditional laboratory conditions. This strategy enabled us to find that *P. aeruginosa* uses a novel QS signal molecule that controls biofilm formation and virulence. The new signal molecule acts together with the long-known QS receptor RhlR. Using physiologic, genetic, and molecular studies, combined with animal models of infection, we characterize the roles of QS components in biofilm formation and virulence. We find that RhlR and the putative new signal molecule are crucial for both traits. Our work suggests that targeting RhlR with small molecule inhibitors could provide an exciting path forward for the development of novel antimicrobials.

## Introduction

Quorum sensing (QS) is a process of bacterial cell-to-cell communication that relies on the production, detection, and response to extracellular signaling molecules called autoinducers [1]. QS allows groups of bacteria to synchronously alter behavior in response to changes in the population density and species composition of the surrounding bacterial community [2,3]. In Gram-negative bacteria, acylated homoserine lactones (AHLs) are common QS autoinducers (reviewed in [4]). Typically, an AHL synthase, usually a LuxI homolog, produces an autoinducer that is bound by a partner transcriptional activator, usually a LuxR homolog. LuxR-AHL complexes regulate expression of genes that underpin group behaviors [5]. LuxR-type proteins contain two domains: an amino-terminal AHL-binding domain and a carboxy-terminal helix-turn-helix (HTH) DNA-binding domain [6,7]. Most LuxR-type receptors require their cognate AHLs to be bound to function, and in some cases, AHL binding is necessary for LuxR-type proteins to fold and thus resist proteolysis [8–10].

Bacterial pathogens often require QS to establish or to promote infection (reviewed in [11]). One such QS bacterium, *Pseudomonas aeruginosa*, is a human pathogen that is frequently responsible for hospital-acquired infections and is the main cause of morbidity and mortality in cystic fibrosis patients [12,13]. The *P. aeruginosa* QS circuit consists of two canonical LuxI/R pairs: LasI/R and RhlI/R (Fig 1) [14–17]. LasI produces and LasR responds to the autoinducer *N*-(3-oxododecanoyl)-L-homoserine lactone (3OC12-HSL). The LasR:3OC12-HSL complex activates transcription of many genes including *rhlR* [18]. RhlR binds to the autoinducer *N*-butanoyl-L-homoserine lactone (C4-HSL), the product of the RhlI synthase [19]. RhlR:C4-HSL directs a large regulon of genes including those encoding virulence factors such as pyocyanin, elastases, and rhamnolipids, some of which are also members of the LasR:3OC12-HSL regulon (Fig 1) [20,21]. *P. aeruginosa* strains harboring mutations in QS regulatory components have been reported to be attenuated for virulence, and thus, interfering with QS holds promise for the development of novel anti-microbial therapies [22–26].

Beyond controlling virulence, QS controls biofilm formation in *P. aeruginosa* [26,27]. Biofilm formation is crucial for *P. aeruginosa* acute and chronic infections [29]. QS-activated genes encoding exoproducts such as the Pel and Psl exopolysaccharides, rhamnolipids, and phenazines are key for biofilms because these products drive the architecture of the developing communities [30–33]. In keeping with this overarching role for QS in biofilm formation, in the laboratory, *P. aeruginosa* *lasR* and *lasI* mutants form defective biofilms that are thin, undifferentiated, and easily eradicated by SDS and antimicrobial treatments [27].

Most research examining the role of QS in *P. aeruginosa* virulence and biofilm formation has focused on the LasI/R system because of its location at the top of the QS signal transduction cascade (Fig 1). Curiously, however, *lasR* loss of function mutants arise in *P. aeruginosa*

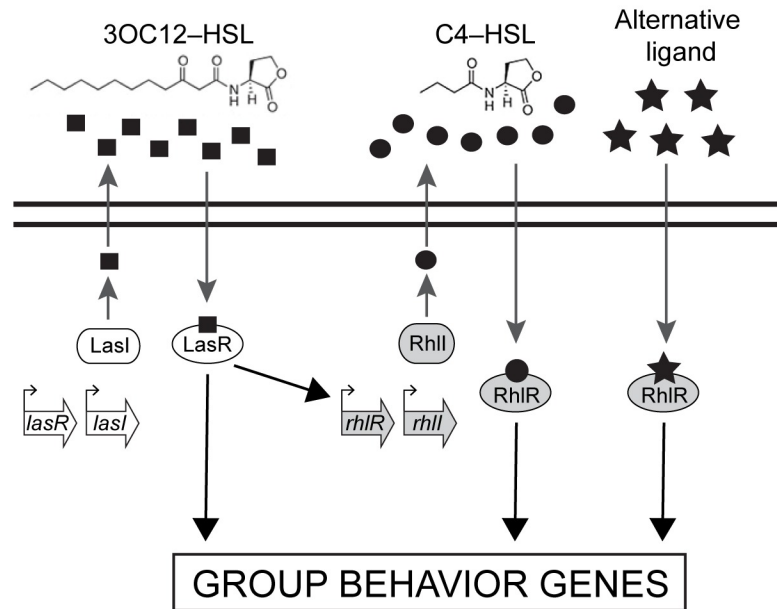

**Fig 1. The *Pseudomonas aeruginosa* LuxR/I-type QS circuit.** Schematic of the acyl-homoserine lactone (AHL) based QS network: LasR/I (white) and RhlR/I (gray). The LasI autoinducer is 3OC12-HSL (squares) and the RhlI autoinducer is C4-HSL (circles). The two black horizontal lines represent the cytoplasmic membrane, regulatory genes are shown in the open arrows, and bent arrows represent promoters. The alternative ligand (represented by the stars) refers to the putative ligand(s) that binds to RhlR and enables RhlI-independent RhlR function.

<https://doi.org/10.1371/journal.ppat.1006504.g001>

chronic cystic fibrosis infections [34–36]. Furthermore, QS-controlled virulence traits are expressed in these *lasR* mutants. A possible clue to this conundrum comes from recent work showing that RhlR, not LasR, is the primary QS regulator during host infection, using *Drosophila* as a model [37]. Given this ambiguity, we wanted to define the role of RhlR in virulence and biofilm formation in *P. aeruginosa*. In this study, we show that RhlR, previously reported to have an obligate dependence on its canonical AHL autoinducer C4-HSL, can function as a transcriptional regulator in the absence of C4-HSL. Indeed, we show that  $\Delta rhlR$  and  $\Delta rhlI$  mutants have dramatically different biofilm phenotypes. Genome-wide transcriptomics analyses show that RhlR and RhlI likewise control distinct regulons with little overlap under biofilm-forming conditions. We also find that crucial RhlR-regulated virulence factors are expressed in the absence of RhlI. Consistent with this result, the  $\Delta rhlI$  mutant infects nematode and mouse animal hosts as effectively as wildtype *P. aeruginosa*, in contrast to the  $\Delta rhlR$  mutant that is attenuated for virulence. Finally, cell-free culture fluids prepared from the  $\Delta rhlI$  mutant possess an activity that stimulates RhlR-dependent gene expression. These findings support the hypothesis that RhlR responds to an alternative ligand, in addition to C4-HSL, and this alternative ligand promotes RhlR-dependent transcriptional activation in the absence of RhlI.

## Results

### *P. aeruginosa* $\Delta rhlR$ and $\Delta rhlI$ mutants have distinct colony biofilm phenotypes

To explore the role of the RhlI/R QS system in *P. aeruginosa* virulence and biofilm formation, we generated in-frame marker-less deletions of the *rhlR* and *rhlI* genes in the UCBPP-PA14 strain of *P. aeruginosa* (hereafter referred to as PA14). We also made the double  $\Delta rhlR \Delta rhlI$

mutant. As expected, deletion of *rhlR* or *rhlI* abolished pyocyanin production in planktonic cultures (Fig 2A) [16]. Introduction of a plasmid expressing *rhlR* under its native promoter complemented pyocyanin production in the  $\Delta rhlR$  mutant (Fig 2A). Likewise, exogenous addition of 10  $\mu$ M C4-HSL to the  $\Delta rhlI$  mutant restored pyocyanin production to wildtype (WT) levels (Fig 2A). Similar results with pyocyanin and other quorum-sensing-controlled phenotypes have been reported previously, including with mutant strains used in the present work [16,38,39,40,41]. These analyses confirm that every component of our system is functional. We note, and we will return to this point later, that similar to other AHL-dependent LuxR-type transcriptional activators, the  $\Delta rhlR$  and  $\Delta rhlI$  mutants phenocopy each other with respect to pyocyanin production in planktonic culture.

*P. aeruginosa* PA14 forms biofilms in submerged systems (flow-cell biofilms), at liquid-air interfaces (pellicles), and on solid-air interfaces (colony biofilms) [30,42]. Colony biofilm formation can be studied using agar plates containing Congo red, a dye that binds to extracellular matrix components [30]. On colony biofilm medium, WT *P. aeruginosa* PA14 exhibited the characteristic, and previously reported, rugose-center/smooth-periphery colony biofilm phenotype after 5 days of growth (Fig 2B) [31]. To our knowledge, the roles of RhlR and RhlI have not previously been investigated in *P. aeruginosa* PA14 colony biofilms. We found that the  $\Delta rhlR$  mutant was hyper-rugose (Fig 2B and S1A Fig) and introduction of *rhlR* on a plasmid restored the WT morphology (Fig 2B). We conclude that RhlR controls colony biofilm development. Surprisingly, the  $\Delta rhlI$  mutant had a phenotype that was strikingly different from the WT and the  $\Delta rhlR$  mutant. The  $\Delta rhlI$  mutant was completely smooth, indeed, even more so than the WT (Fig 2B; S1A Fig). Exogenous addition of 10  $\mu$ M C4-HSL to the agar medium restored the WT biofilm phenotype to the  $\Delta rhlI$  mutant (Fig 2B). The  $\Delta rhlR$  phenotype is epistatic to the  $\Delta rhlI$  phenotype because the  $\Delta rhlR \Delta rhlI$  double mutant phenocopies the  $\Delta rhlR$  single mutant (Fig 2B; S1B Fig). This phenotypic difference also occurred on agar plates lacking any dyes, confirming that the distinct morphologies of the  $\Delta rhlR$  and  $\Delta rhlI$  mutants are not a consequence of the Congo red medium (S1C Fig). The  $\Delta rhlR$  mutant colony biofilms expanded to cover more surface area than did those of the WT and the  $\Delta rhlI$  mutant (Fig 2C; S1A Fig). These results are in stark contrast to those for the LasI/R system: we constructed marker-less in-frame  $\Delta lasR$  and  $\Delta lasI$  mutants and found that both mutants have identical pyocyanin, colony biofilm, and surface coverage phenotypes (S2A, S2B and S2C Fig).

A previous genome-wide small RNA-seq study identified a putative trans-acting sRNA called SPA0104 in *P. aeruginosa* PA14 [43]. The SPA0104 gene is located between the *rhlR* and *rhlI* genes, co-oriented and overlapping with the *rhlI* promoter [43]. To determine if SPA0104 is involved in the different  $\Delta rhlR$  and  $\Delta rhlI$  phenotypes we observed above, we engineered stop codons into the *rhlR* and *rhlI* genes: *rhlR*<sup>W11STOP</sup> and *rhlI*<sup>F50STOP</sup>. Our rationale was that insertion of a stop codon would prevent translation of the full-length RhlR or full length RhlI protein without affecting transcription of SPA0104, enabling us to determine if the SPA0104 sRNA contributed to the biofilm phenotypes. Neither of the mutants produced pyocyanin showing that, in the case of RhlR and RhlI, introduction of the stop codon eliminated function (S2A Fig). Nonetheless, the *rhlR*<sup>W11STOP</sup> mutant was hyper-rugose and the *rhlI*<sup>F50STOP</sup> mutant was completely smooth in the colony biofilm assay (S2D Fig). We therefore conclude that the  $\Delta rhlR$  and  $\Delta rhlI$  mutants have distinct colony biofilm phenotypes and the SPA0104 sRNA plays no role in conferring these phenotypes.

Rhamnolipids, RhlR-activated exoproducts, have been reported to disperse biofilms [44,45]. Thus, it was possible that, in the  $\Delta rhlR$  mutant, the absence of rhamnolipids decreased dispersal, and this defect in the process conferred the hyper-rugose phenotype. If so, disabling rhamnolipid production should cause a hyper-rugose phenotype irrespective of the presence or absence of RhlR. We investigated this possibility by inactivating the rhamnolipid biosynthetic gene *rhlA*

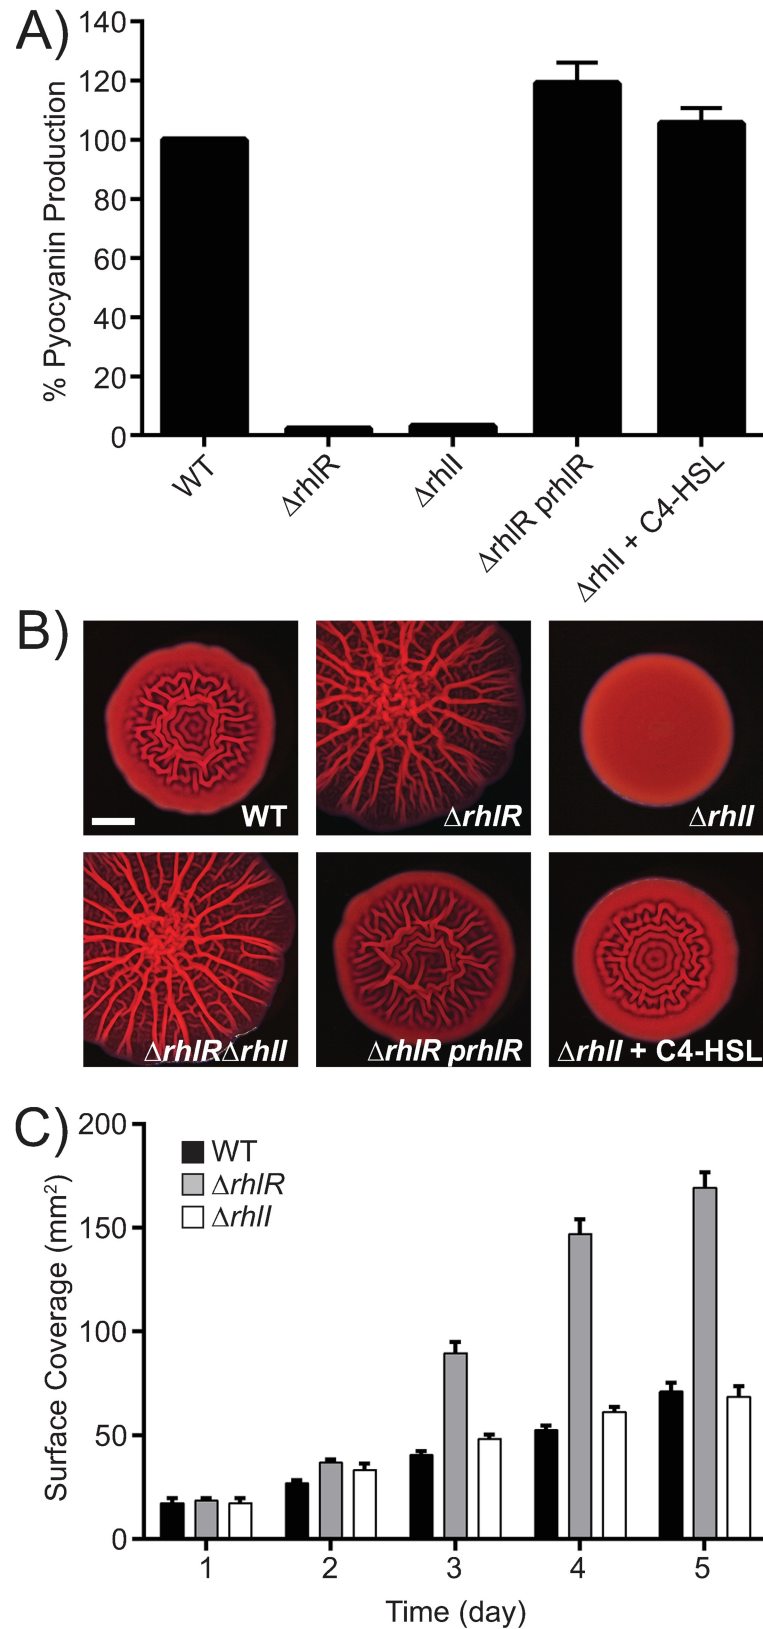

**Fig 2. *P. aeruginosa*  $\Delta rhII$  and  $\Delta rhIR$  mutants have distinct colony biofilm phenotypes.** A) Pyocyanin production was measured at OD<sub>695</sub> in cell-free culture fluids prepared from the WT,  $\Delta rhIR$  mutant,  $\Delta rhII$

mutant,  $\Delta rhIR$  mutant complemented with the *rhIR* gene under its native promoter on pUCP18 (*prhIR*), and the  $\Delta rhII$  mutant supplied with exogenous 10  $\mu$ M C4-HSL. Error bars represent SD for three biological replicates. B) Colony biofilm phenotypes of the strains in panel A and the  $\Delta rhIR \Delta rhII$  double mutant. Again, 10  $\mu$ M C4-HSL was added to the  $\Delta rhII$  mutant. Scale bar is 2 mm. C) Colony biofilm surface area quantitation for the indicated strains over 5 days. Error bars represent SEM of three independent experiments.

<https://doi.org/10.1371/journal.ppat.1006504.g002>

[46,47] via introduction of a stop codon (*rhIA*<sup>C11STOP</sup>). The *rhIA*<sup>C11STOP</sup> mutant has a colony biofilm phenotype that is indistinguishable from the WT, so it is not hyper-rugose (S3 Fig). By contrast, the  $\Delta rhIR rhIA<sup>C11STOP</sup> double mutant is hyper-rugose, and the  $\Delta rhII rhIA<sup>C11STOP</sup> double mutant is completely smooth (S3 Fig). We therefore conclude that rhamnolipids are not involved in the distinct colony biofilm phenotypes we have discovered for the  $\Delta rhIR$  and  $\Delta rhII$  mutants.$$

## RhIR and RhII control distinct but overlapping regulons

To define the molecular basis underpinning the different  $\Delta rhIR$  and  $\Delta rhII$  colony biofilm phenotypes, we used RNA-seq to compare the genomic transcriptional profiles of the WT,  $\Delta rhIR$ , and  $\Delta rhII$  strains. We performed the experiment under two conditions: on mRNA harvested from high cell density (HCD) planktonic cultures and on mature colony biofilms. To our knowledge, this is the first transcriptional profiling study performed on the  $\Delta rhII$  mutant. The results from HCD planktonic cultures match previously published studies for the WT and the  $\Delta rhIR$  mutant [18,26]. Roughly 127 genes constitute the RhIR regulon, defined as greater than two-fold changes in expression in the  $\Delta rhIR$  mutant compared to the WT in HCD planktonic cultures (Fig 3A, S1 Table). Seventy-three of those genes were also regulated by RhII. Under colony biofilm forming conditions, the  $\Delta rhIR$  mutant exhibited differences in expression of 137 genes compared to the WT. However, only 18 of those genes showed more than two-fold changes in the  $\Delta rhII$  mutant relative to the WT (Fig 3A; S2 Table). Thus, of the RhIR-regulated genes, ~54% were in common between the  $\Delta rhIR$  and  $\Delta rhII$  mutants in HCD planktonic cultures. By contrast, there was only ~13% overlap in the RhIR-directed gene expression profiles in these two mutants in colony biofilms (Fig 3A; S1 and S2 Tables). We note that 9 and 6 genes were uniquely regulated by RhII under planktonic and colony biofilm formation conditions, respectively. A few autoinducer-dependent, receptor-independent QS-regulated genes have been reported previously for the *P. aeruginosa* Las system [40,48]. In summary, RhIR regulates the expression of numerous genes independently of its canonical AHL autoinducer C4-HSL.

The most striking difference between the transcriptional profiles of the  $\Delta rhIR$  and  $\Delta rhII$  mutants in planktonic and colony biofilm culture conditions concerned the phenazine (*phz*) biosynthesis genes (S1 and S2 Tables). Specifically, each *phz* gene exhibited 10-fold lower expression in both the  $\Delta rhIR$  and  $\Delta rhII$  mutants compared to the WT in HCD planktonic culture (Fig 3B). In colony biofilms, the  $\Delta rhIR$  mutant continued to exhibit 10-fold lower expression of *phz* genes compared to WT. However, the  $\Delta rhII$  mutant expressed the *phz* genes at WT levels (Fig 3B).

Endogenously produced phenazines act as redox-active small molecules to modulate *P. aeruginosa* colony biofilm morphogenesis. Specifically, mutants that overproduce phenazines have smooth morphologies, whereas mutants that are unable to produce phenazines are hyper-rugose compared to the WT [30,31,33]. We suggest that the  $\Delta rhII$  mutant has a smooth colony biofilm phenotype due to overproduction of phenazines while the  $\Delta rhIR$  mutant forms a hyper-rugose biofilm colony due to the lack of phenazines. We verified this idea using two different approaches. First, we deleted the two phenazine biosynthesis operons ( $\Delta phz1$  and  $\Delta phz2$ ; we call this double mutant  $\Delta phz$ ) in the WT and in the  $\Delta rhIR$  and  $\Delta rhII$  mutant backgrounds. All of the  $\Delta phz$  mutants were hyper-rugose under colony biofilm growth conditions (Fig 3C). Second, we

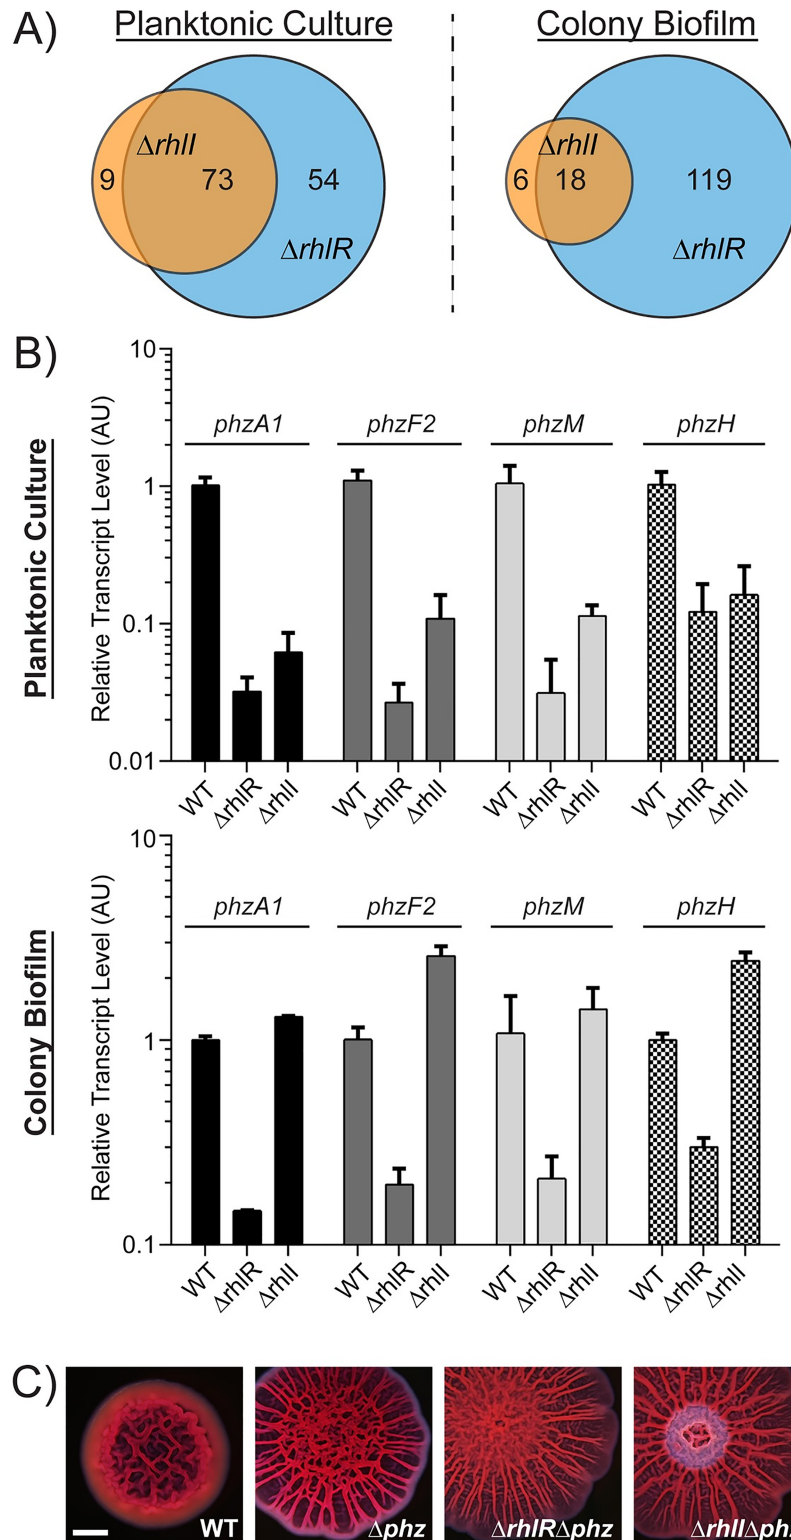

**Fig 3. *P. aeruginosa* has distinct RhlR and RhlI regulons.** A) Venn diagram showing differentially expressed genes in the  $\Delta rhII$  and  $\Delta rhIR$  *P. aeruginosa* PA14 strains at high cell density (denoted Planktonic Culture; OD<sub>600</sub> = 2.0) and in colony biofilms grown on Congo red agar medium for 5 days (denoted Colony Biofilm). Blue circles represent differentially expressed genes in the  $\Delta rhIR$  *P. aeruginosa* strain compared to the WT strain. Orange circles indicate differentially expressed genes in the  $\Delta rhII$  *P. aeruginosa* strain

compared to the WT strain. Numbers of cDNA reads for annotated genes were compared to the WT strain under the same conditions. Statistically significant genes ( $P < 0.001$ ) that changed  $>2$ -fold are shown (see S1 and S2 Tables). RNA-seq was performed on three biological replicates per strain and per condition. B) Relative expression of the representative phenazine biosynthesis genes *phzA1* (black), *phzF2* (dark gray), *phzM* (light gray), and *phzH* (checkered). Data are normalized to 16S RNA measured by qRT-PCR in WT,  $\Delta$ *rhlR*, and  $\Delta$ *rhlI* strains in high cell density ( $OD_{600} = 2.0$ ) planktonic culture (top panel) and in colony biofilms on Congo red agar medium after 5 days (bottom panel). Error bars represent SD of three replicates. AU denotes arbitrary units. C) Colony biofilm morphology of the WT,  $\Delta$ *phz*, and the  $\Delta$ *rhlR*  $\Delta$ *phz*, and  $\Delta$ *rhlI*  $\Delta$ *phz* mutants. Scale bar is 2 mm.

<https://doi.org/10.1371/journal.ppat.1006504.g003>

quantified pyocyanin production from the WT, the  $\Delta$ *rhlR* and  $\Delta$ *rhlI* single mutants, and the  $\Delta$ *rhlI*  $\Delta$ *phz* double mutant when grown as colony biofilms. The wild-type colony biofilm produced  $\sim 2 \mu\text{g} / 10^5$  CFU pyocyanin, the  $\Delta$ *rhlI* colony biofilm produced four-fold more pyocyanin, while the  $\Delta$ *rhlR* mutant and the  $\Delta$ *rhlI*  $\Delta$ *phz* double mutant produced none (S4 Fig). Together, the deletion analysis and pyocyanin production results show that the  $\Delta$ *rhlI* smooth colony biofilm phenotype is caused by overproduction of phenazines.

In *P. aeruginosa* PA14, the hyper-rugosity conferred by the absence of phenazines requires Pel, the primary biofilm matrix exopolysaccharide (note: *P. aeruginosa* PA14 does not produce the Psl exopolysaccharide) [28,30,32]. We examined the colony biofilm phenotypes of the  $\Delta$ *pelA* single and the  $\Delta$ *rhlR* $\Delta$ *pelA* and  $\Delta$ *rhlI* $\Delta$ *pelA* double mutants. All of these mutants had completely smooth colony morphologies (S5 Fig). Thus, the Pel exopolysaccharide is required for the  $\Delta$ *rhlR* mutant to exhibit the hyper-rugose biofilm phenotype. We note that the mechanism by which the overproduction of phenazines downregulates Pel to cause the smooth colony biofilm phenotype is unknown and beyond the scope of this study. What is crucial for our work is that the  $\Delta$ *rhlI* mutant retains the ability to produce phenazines in colony biofilms while the  $\Delta$ *rhlR* mutant does not.

### RhlR regulon genes exhibit discrete levels of RhlI dependence

Close inspection of the RNA-seq data from the HCD planktonic cultures (S1 Table) revealed three classes of RhlR-regulated genes based on their dependence on RhlI: genes which we call Class I, exemplified by *chiC*, that require RhlI for RhlR-mediated activation; Class II genes, represented by *rhlA*, that require RhlR for activation but are only partially RhlI dependent, and Class III genes, such as *hcnA*, that require RhlR for activation but are RhlI independent. Fig 4 shows quantitative RT-PCR results for the representative genes and complementation assays are shown in Fig 2 and S6 Fig. Based on this classification scheme, the phenazine biosynthesis genes exhibit Class I behavior in HCD planktonic cultures but they behave as Class III genes in colony biofilms. We infer that an as yet unknown ligand(s) exists that allows RhlR to function independently of RhlI in colony biofilms (Fig 1). We speculate that this ligand increases during biofilm formation and promotes RhlR-dependent activation of *phz* transcription in the absence of the canonical, RhlI-produced autoinducer C4-HSL (Fig 3B).

### Cell-free culture fluids from the $\Delta$ *rhlI* mutant activate RhlR-dependent gene expression

To garner evidence for a new ligand that acts in conjunction with RhlR, we made a fluorescent transcriptional reporter fusion to the *rhlA* promoter (*PrhlA-mNeonGreen*). We chose to follow *rhlA* because it is a Class II gene (Fig 4), and thus, is expressed in a RhlR-dependent manner both in the presence and absence of RhlI. We incorporated the reporter fusion into an intergenic region on the chromosomes of WT *P. aeruginosa* and the  $\Delta$ *rhlR* and  $\Delta$ *rhlI* mutants. The *PrhlA-mNeonGreen* reporter exhibited 10-fold lower expression in the  $\Delta$ *rhlR* mutant than the



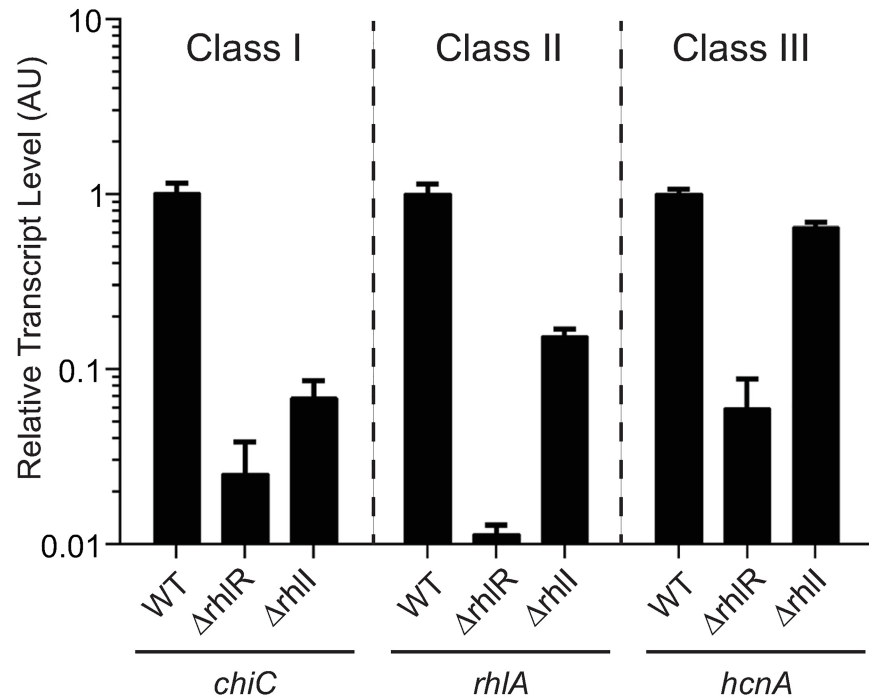

**Fig 4. RhlR-activated genes exhibit varying levels of RhlI dependence.** Relative expression of the *chiC*, *rhIA*, and *hcnA* genes normalized to 16S rRNA measured by qRT-PCR in the WT,  $\Delta rhlR$ , and  $\Delta rhlI$  strains at high cell density ( $OD_{600} = 2.0$ ). Class I, II, III denote RhlI-dependent, partially dependent, and independent genes, respectively. AU denotes arbitrary units. Error bars represent SD of three replicates.

<https://doi.org/10.1371/journal.ppat.1006504.g004>

WT (set to 100%) in HCD planktonic culture (S7A Fig). Expression of the reporter in the  $\Delta rhlI$  mutant was reproducibly 30% of that in the WT (S7A Fig). These results show that, first, RhlR is absolutely required for expression of *PrhlA-mNeonGreen* and, second, the reporter fusion continues to be expressed when RhlR is present but RhlI (i.e., C4-HSL) is not. By contrast, the  $\Delta lasR$  and  $\Delta lasI$  mutants both exhibit low, but identical, reporter activity (S7A Fig). Thus, LasR does not control *rhIA* in the absence of LasI (i.e., 3OC12-HSL). Next, we built a strain in which we deleted the *lasR*, *lasI*, *rhlR*, and *rhlI* genes (called  $\Delta 4$ ) and inserted an arabinose-inducible *rhlR* gene at the *glmS* locus. We call this strain  $\Delta 4 P_{BAD-rhlR}$ . We inserted the *PrhlA-mNeonGreen* transcriptional reporter fusion onto the chromosomes of the  $\Delta 4$  and the  $\Delta 4 P_{BAD-rhlR}$  strains. Both the  $\Delta 4$  mutant and the  $\Delta 4 P_{BAD-rhlR}$  strain showed background level reporter activity similar to the  $\Delta rhlR$  mutant (S7A Fig). Exogenous addition of DMSO to the  $\Delta 4 P_{BAD-rhlR}$  strain in conjunction with L-arabinose induction of *rhlR* also resulted in background activity, which indicates that unliganded RhlR is not capable of activating gene expression (Fig 5, gray bars). Addition of 10  $\mu$ M synthetic C4-HSL, along with L-arabinose induction of *rhlR*, restored the WT level of reporter activity. We set this level of activity to 100%. Addition of 10  $\mu$ M synthetic 3OC12-HSL or 50  $\mu$ M synthetic PQS (2-heptyl-3-hydroxy-4-quinolone, a third *P. aeruginosa* QS autoinducer that functions together with a receptor called PqsR [49]) to the  $\Delta 4 P_{BAD-rhlR}$  strain, along with L-arabinose, did not activate reporter activity above background levels (Fig 5, gray bars). Thus, neither 3OC12-HSL nor PQS activate RhlR-driven transcription of *rhIA*, and so those QS molecules cannot be responsible for the activity present in the cell-free culture fluids prepared from the  $\Delta rhlI$  mutant.

We next determined whether the activity driving RhlR-dependent expression of the *PrhlA-mNeonGreen* reporter fusion in the  $\Delta rhlI$  mutant is present in cell-free culture fluids.

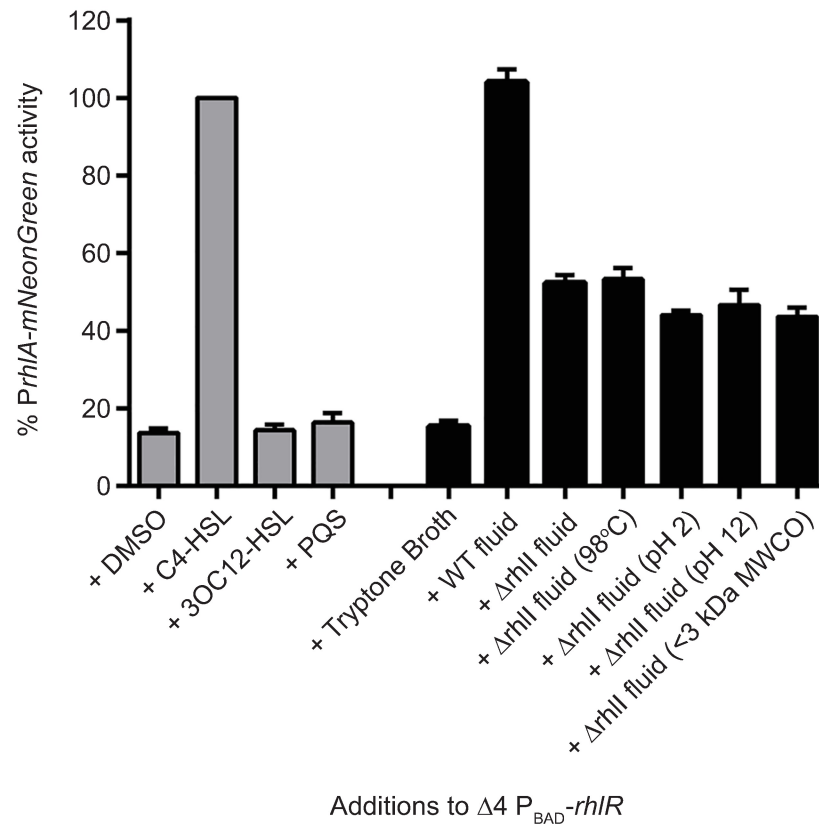

**Fig 5. Cell-free culture fluids from the  $\Delta rhlI$  mutant activate RhlR-dependent gene expression.** *rhlA* expression was measured using a chromosomally encoded *PrhIA*-*mNeonGreen* transcriptional reporter. Gray bars represent *rhlA* reporter activity when *rhlR* was induced in the  $\Delta lasR \Delta lasI \Delta rhlR \Delta rhlI$  (i.e.,  $\Delta 4 P_{BAD}\text{-}rhlR$ ) strain with 0.1% L-arabinose in the presence of 1% DMSO, 10  $\mu$ M C4-HSL, 10  $\mu$ M 3OC12-HSL, or 50  $\mu$ M PQS. DMSO was used as the solvent for C4-HSL, 3OC12-HSL, and PQS. The *rhlA* reporter activity was set to 100% when 10  $\mu$ M C4-HSL was added. In the cultures represented by the black bars, *PrhIA*-*mNeonGreen* was monitored in response to 20% (v/v) of the indicated cell-free culture fluids subjected to the specified treatments. Error bars represent SEM for three biological replicates.

<https://doi.org/10.1371/journal.ppat.1006504.g005>

Exogenous addition of 20% (v/v) WT cell-free culture fluids to the  $\Delta 4 P_{BAD}\text{-}rhlR$  strain in conjunction with L-arabinose induction of *rhlR* resulted in 10-fold higher reporter activity compared to the background activity obtained following the addition of medium (Fig 5, black bars). Addition of cell-free culture fluids from the  $\Delta rhlI$  mutant stimulated 55% of the activity stimulated by WT cell-free culture fluids, consistent with the idea that a ligand is indeed present in  $\Delta rhlI$  culture fluids that can activate RhlR (Fig 5). We considered the possibility that the  $\Delta rhlI$  mutant produced C4-HSL by a non-RhlI-mediated mechanism. However, LC-MS analyses showed that C4-HSL was present in WT cell-free cultures fluids whereas none could be detected in fluids from the  $\Delta rhlI$  mutant (S8 Fig), eliminating this formal possibility. We undertook an initial characterization of the activity. It is stable to high temperature, acidic and basic conditions, and it passes through a 3 kDa size exclusion filter (Fig 5). These results preliminarily suggest that the alternative ligand is a small molecule that is not a homoserine lactone (homoserine lactones are not base or heat stable, [50]). We also tested whether phenazines could be the alternate ligand. To do this, we supplied cell-free culture fluids from the  $\Delta rhlI \Delta phz$  mutant to the *PrhIA*-*mNeonGreen* reporter strain and compared the fluorescence output to that when cell-free culture fluids from the  $\Delta rhlI$  mutant were supplied. Both preparations elicited the

same amount of reporter activity (S7B Fig) showing that phenazines are not capable of activating RhIR-driven gene expression. We conclude that the  $\Delta rhII$  mutant cell-free culture fluids contain an as-yet-unknown ligand(s) that is capable of activating RhIR-dependent target gene expression.

### RhIR functions independently of RhII in animal infection models

Our finding that RhIR is active in the absence of RhII suggested to us that there could be RhII-independent RhIR function under non-laboratory conditions such as during host infection. To probe this possibility, we assessed the relative pathogenicity of WT,  $\Delta rhIR$ , and  $\Delta rhII$  *P. aeruginosa* PA14 strains in a *Caenorhabditis elegans* fast-kill infection assay [26,51]. The  $\Delta rhIR$  mutant was completely avirulent in this assay, while the  $\Delta rhII$  mutant remained fully virulent, killing worms as proficiently as WT *P. aeruginosa* PA14 (Fig 6A). By contrast, both the  $\Delta lasR$ ,

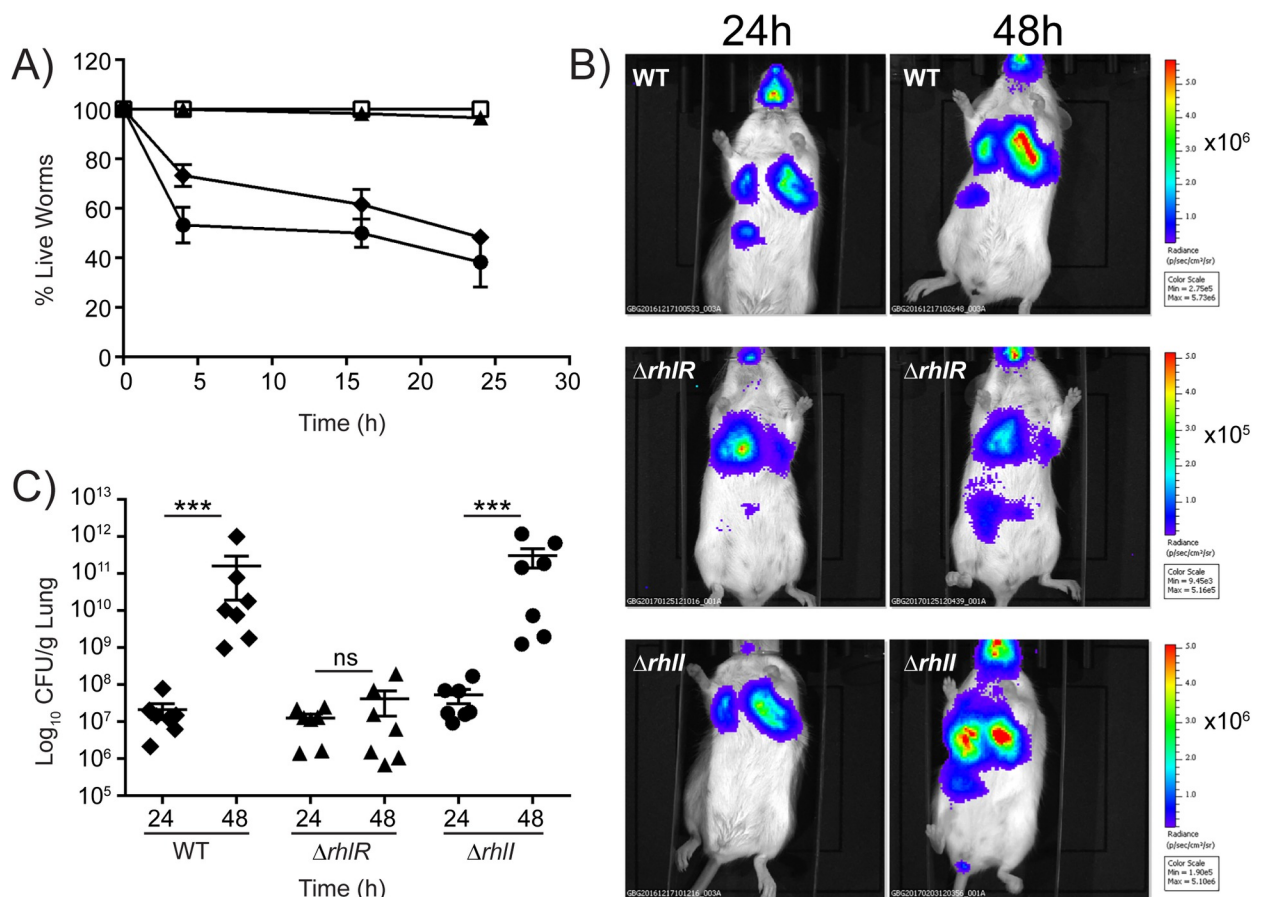

**Fig 6. The *P. aeruginosa*  $\Delta rhII$  mutant is virulent and the  $\Delta rhIR$  mutant is avirulent in animal infection models.** A) *C. elegans* were applied to lawns of *E. coli* OP50 (open squares), WT *P. aeruginosa* PA14 (closed diamonds),  $\Delta rhIR$  mutant (closed triangles), and  $\Delta rhII$  mutant (closed circles). Error bars represent SEM of three independent replicates. B) Real-time monitoring of WT *P. aeruginosa* PA14 *P1-lux* and isogenic mutants in the acute pneumonia model. BALB/c mice infected with WT,  $\Delta rhIR$ , and  $\Delta rhII$  strains were imaged at 24 and 48 h using an IVIS CCD camera following intratracheal infection. Imaging was performed from the ventral side of representative mice while the animals were under isoflourane anesthesia. The color bars indicate the intensity of the bioluminescence output, with red and blue denoting the high and low signals, respectively. Note that the color scales on the various mouse bioluminescence imaging panels are not the same. C) Bacterial load in lung homogenates of mice infected intratracheally with WT *P. aeruginosa* PA14, and the  $\Delta rhIR$  and  $\Delta rhII$  mutants. Each symbol represents a single mouse. The data are pooled from two independent experiments. Data were analyzed using the Mann-Whitney U test. \*\*\* P < 0.001 and ns means not significant.

<https://doi.org/10.1371/journal.ppat.1006504.g006>

and  $\Delta lasI$  mutants were as virulent as the WT (S9A Fig). These results demonstrate that RhIR does indeed function in the absence of the canonical C4-HSL autoinducer to control virulence in nematodes. Phenazines mediate *C. elegans* killing in the fast-kill infection assay. To determine if the overproduction of phenazines in the  $\Delta rhII$  strain was responsible for the virulence phenotype, we deleted the two phenazine biosynthetic gene clusters, *phzA1-G1* and *phzA2-G2*, in the  $\Delta rhII$  mutant (called  $\Delta rhII \Delta phz$ ). The  $\Delta rhII \Delta phz$  mutant was attenuated for virulence similar to the  $\Delta phz$  mutant (S10 Fig) showing that the production of phenazines underpins pathogenicity in the  $\Delta rhII$  strain.

We also examined the roles of the different QS regulators in a Balb/c murine model of acute *P. aeruginosa* lung infection. The 50% lethal doses (LD<sub>50</sub>) for the WT,  $\Delta rhIR$ ,  $\Delta rhII$ ,  $\Delta lasR$ , and  $\Delta lasI$  *P. aeruginosa* PA14 strains were  $1.90 \times 10^6$  CFU,  $2.6 \times 10^6$  CFU,  $1.1 \times 10^6$  CFU,  $3.0 \times 10^6$  CFU, and  $4.8 \times 10^6$  CFU, respectively. To assess the effects of these mutations on virulence in the murine model, we monitored the time-dependence of infection following intratracheal challenge with sublethal doses (~0.5 LD<sub>50</sub>) of the strains under study. All of the strains carried a constitutively-expressed *luxCDABE* operon that had been inserted in the chromosome at the *glmS* locus, which enabled real-time monitoring of bacterial colonization of the mouse during the course of infection using an IVIS Imaging System. At 24 h, comparable levels of bioluminescence were detected, primarily in the lungs, in all of the infected mice. At 48 h, however, the signal was approximately 20-fold stronger in mice infected with the WT and the  $\Delta rhII$  strain than in mice infected with the  $\Delta rhIR$ ,  $\Delta lasI$ , and  $\Delta lasR$  strains (Fig 6B; S9B Fig). The imaging data were validated by determining the viable *P. aeruginosa* CFU per gram of lung homogenate. At 24 h post-infection, all of the infected mice had similar bacterial burdens. The average CFU/gram were  $2.1 \times 10^7$  for WT,  $1.2 \times 10^7$  for the  $\Delta rhIR$  strain, and  $5.2 \times 10^7$  for the  $\Delta rhII$  strain (Fig 6C). At 48 h post-infection, the bacterial load in the lungs of mice infected with the WT and  $\Delta rhII$  mutant had increased to  $1.6 \times 10^{11}$  and  $3.1 \times 10^{11}$  CFU/gram, respectively (Fig 6C). By contrast, the bacterial load in lungs of mice infected with the  $\Delta rhIR$  strain did not increase significantly between 24 and 48 h, maintaining an average of  $4.1 \times 10^7$  CFU/gram. Thus, the WT and  $\Delta rhII$  mutant produce a four-order of magnitude larger burden of bacteria in the murine host than does the  $\Delta rhIR$  strain. Unlike in the *C. elegans* infection assay, in the murine model of acute lung infection, the  $\Delta lasI$  and  $\Delta lasR$  mutants did not display the same level of virulence as the WT, but, rather, were attenuated. Specifically, at 48 h, mice infected with the  $\Delta lasI$  and  $\Delta lasR$  strains maintained the same bacterial load as at 24 h (S9C Fig). We discuss these differences below. In summary, our results show that RhIR is active in the absence of the RhII-produced autoinducer in both the *C. elegans* and the murine animal models. Presumably, a ligand, other than C4-HSL, promotes RhIR function in these two animal assays.

## Discussion

*P. aeruginosa* uses its two major LuxI/R QS systems, the Las and Rhl systems, to orchestrate the synchronous production of virulence factors and to form biofilms [52]. Both LasR and RhIR regulate gene expression at high cell density when bound to their cognate AHLs. Both receptors recognize DNA motifs possessing dyad symmetry called *las-rhl* boxes, and both receptors are global transcriptional regulators [20,21]. Here we show, for the first time, that unlike LasR that requires its canonical 3OC12-HSL autoinducer to regulate transcription, RhIR, controls gene expression in both a C4-HSL-dependent and C4-HSL-independent manner. Importantly, C4-HSL-independent regulation by RhIR appears to be highly relevant in biofilms and is critical for pathogenicity in animal models of *P. aeruginosa* infection.

One mechanism by which RhIR could function in the absence of RhII is if RhIR activates transcription of target genes without bound ligand. Indeed, LuxR-type regulators with such

capability exist. Unliganded EsaR from *Pantoea stewartii*, ExpR from *Erwinia chrysanthemi*, and VirR from *E. carotovora* adopt active dimeric conformations and repress transcription [53–55]. However, RhIR is insoluble, and thus must be inactive, when not bound to a ligand [26]. Consistent with this notion, RhIR displays no basal activity in the absence of exogenously supplied C4-HSL in an *E. coli* overexpression assay [41]. While it remains a formal possibility that RhIR functions in the absence of a ligand, another possibility that is more consistent with our data and with what is known about RhIR is that an alternative ligand exists that enables RhIR to act as a transcription factor. Our finding that cell-free culture fluids from the  $\Delta rhII$  mutant activate RhIR-dependent gene expression strongly supports the alternative ligand hypothesis. We are currently working to purify and identify this putative ligand. The alternative ligand does not appear to be an AHL: the *P. aeruginosa* genome contains only two LuxI homologs, LasI and RhII, and the LasI product 3OC12-HSL does not stimulate RhIR-dependent gene expression (Fig 5). Furthermore, 3OC12-HSL is known to inhibit RhIR activity [38]. The alternative ligand is stable in alkaline pH and at high temperatures while canonical AHLs are not [49]. A non-AHL ligand made by a non-LuxI-type synthase is also a possibility, and consistent with this notion, the LuxR homologs PluR and PauR in *Photobacterium* spp. bind to pyrones and dialkylresorcinols, respectively, to regulate target gene expression [56,57]. As far as is known, PluR and PauR do not bind AHLs.

LuxR-type proteins exhibit a spectrum of specificities for ligands. Some LuxR-type proteins, including LasR and TraR, are exquisitely specific for their cognate autoinducers [6,58]. Others, including SdiA and CviR, are promiscuous and bind to a variety of AHLs [59,60]. Ligand recognition promiscuity could be a mechanism that enhances the versatility of QS systems in different niches. By expanding the repertoire of stimuli detected, and linking the binding of particular ligands by a LuxR-type receptor to expression of particular subsets of target genes, bacteria could reuse their LuxR-type receptors to tune into and successfully colonize different habitats. Such a scenario would endow *P. aeruginosa* with the plasticity to diversify its QS outputs, while also being especially economical because it does not necessitate the evolution of a new transcription factor for every small molecule stimulus that is detected. Indeed, *P. aeruginosa* occupies diverse environments including soil, marshes, plants and animals, and QS is required for success in all of these niches [61,62].

It is possible that additional ligands exist for RhIR, and perhaps for LasR, beyond the new activity we have uncovered here for RhIR. We suggest that each such a ligand or sets of ligands are vital in particular niches making their discovery difficult under laboratory conditions. Indeed, our experiments revealed the activity of one putative alternative RhIR ligand only because we examined colony biofilm conditions, rather than traditional liquid growth. Consistent with this assertion, RNA-seq profiles from *P. aeruginosa* HCD planktonic cultures and colony biofilms show that RhIR is dramatically less dependent on RhII, and thus the C4-HSL ligand, in colony biofilms than in planktonic culture. We speculate that the concentration of our proposed alternative ligand increases in colony biofilms enabling the transition of RhIR from being predominantly bound to C4-HSL to being predominantly bound to the alternative ligand. This change, in turn, promotes the transition from expression of RhIR-directed Class I to RhIR-directed Class II and Class III target genes. In this respect, RhIR resembles the multiple antibiotic resistance regulator MarR and homologs from diverse bacteria and nuclear receptors from higher eukaryotes that bind multiple ligands, and depending on which ligand is bound, control expression of discrete subsets of genes [63,64].

Phenazine production contributes to virulence in diverse *P. aeruginosa* infection models [33,52,65]. Consistent with this finding, we showed that the  $\Delta rhII$  mutant that produces phenazines is virulent in both a nematode and a murine infection model while the  $\Delta rhIR$  mutant, which is defective for phenazine production, is attenuated (Fig 6). Our finding that the  $\Delta lasR$

and  $\Delta lasI$  mutants produce phenazines in nematode assay medium provides one condition in which the Rhl system bypasses the requirement for the Las system to promote downstream QS target gene expression (S11 Fig). Phenazine production presumably enables the  $\Delta lasR$  and  $\Delta lasI$  mutants to exhibit WT level virulence in the *C. elegans* fast-kill infection assay. We do note, however, that the  $\Delta lasR$  and  $\Delta lasI$  mutants fail to establish a WT level of infection in the murine acute pneumonia model suggesting that a factor(s) other than phenazines plays a crucial role in virulence in mice.

Previous studies have examined QS control of *P. aeruginosa* virulence in a mouse burn model [13], a corneal infection model [66], a murine neonatal model of acute pneumonia [67], and mouse and rat models of chronic lung infection [68,69]. The majority of these earlier studies were performed using *las* mutants or strains containing both *las* and *rhl* mutations. Rumbaugh *et al* [13] reported that the *P. aeruginosa* PA14  $\Delta rhlI$  mutant was significantly less virulent than the WT in a mouse burn model. Our results show that the *P. aeruginosa* PA14  $\Delta rhlI$  single mutant is as virulent as WT in a murine acute pneumonia model. Tissue specific responses to different *P. aeruginosa* PA14 virulence factors could explain these different results.

Our *in vivo* imaging of *P. aeruginosa* following intratracheal infection of BALB/c mice revealed infection beyond the respiratory tract (Fig 6B; S9B Fig). The components driving dissemination are not currently known. Earlier rodent studies examining respiratory infection by *P. aeruginosa* PA14 did not monitor infection in other organs [70,71]. *P. aeruginosa* PA14 produces the cytotoxin ExoU [72], potentially enabling endothelial permeability and systemic escape of bacteria from the mouse lung into the periphery. However, whether ExoU is responsible for the dissemination from the mouse lung has not been examined. Going forward, the experimental system we developed in this work provides the opportunity to test ExoU as well as other components for roles in *P. aeruginosa* PA14 dissemination and systemic infection burden in a mammalian context.

*P. aeruginosa* is a pathogen of high clinical relevance that has acquired resistance to commonly used antibiotics, and is now a priority pathogen on the Centers for Disease Control and Prevention ESKAPE pathogen list (a set of bacteria including *Enterococcus faecium*, *Staphylococcus aureus*, *Klebsiella pneumoniae*, *Acinetobacter baumannii*, *Pseudomonas aeruginosa* and *Enterobacter* spp. designated as multi-drug resistant pathogens requiring new antimicrobials for treatment) [73–75] and a critical pathogen on the World Health Organization's priority list [76]. Furthermore, it is now well recognized that *lasR* mutants arise during adaptation of *P. aeruginosa* to the cystic fibrosis lung environment [34–36]. The LasI/R system is at the top of the QS hierarchy and LasR:3OC12-HSL is required for *rhlI* expression, activating *rhlI* transcription 20-fold (Fig 1, [17]). Thus, a longstanding mystery of urgent clinical importance has been to understand how QS-regulated virulence factors continue to be expressed in the *lasR* mutants obtained from patients. Our work provides insight into one possible mechanism: the alternative RhlR ligand stabilizes the basal level of RhlR protein that is produced in the absence of LasR, enabling RhlR-dependent virulence gene expression. We propose that targeting RhlR with small molecule inhibitors could provide an exciting path forward for the development of novel antimicrobials.

## Materials and methods

### Strains and growth conditions

*P. aeruginosa* UCBPP-PA14 strain was grown in lysogeny broth (LB) (10 g tryptone, 5 g yeast extract, 5 g NaCl per L), in 1% Tryptone broth (TB) (10 g tryptone per L) and on LB plates fortified with 1.5% Bacto agar at 37°C. When appropriate, antimicrobials were included at the

following concentrations: 400 µg/mL carbenicillin, 30 µg/mL gentamycin, 100 µg/mL irgasan, 750 µg/mL trimethoprim.

## Strain construction

To construct marker-less in-frame chromosomal deletions in *P. aeruginosa*, DNA fragments flanking the gene of interest were amplified, assembled by the Gibson method, and cloned into pEXG2 (a generous gift from Dr. Joseph Mougous) [77,78]. The resulting plasmids were used to transform *Escherichia coli* SM10λpir, and subsequently, mobilized into *P. aeruginosa* PA14 via biparental mating. Exconjugants were selected on LB containing gentamicin and irgasan, followed by recovery of deletion mutants on LB medium containing 5% sucrose. Candidate mutants were confirmed by PCR. The *rhlR*<sup>W11STOP</sup>, *rhlI*<sup>F50STOP</sup> and *rhlA*<sup>C11STOP</sup> mutants were generated by the above method using overlapping Gibson assembly primers containing the mutations. The *rhlR* complementation plasmid was constructed by inserting DNA containing ~500 bp upstream of the *rhlR* gene and the entire *rhlR* open-reading frame using HindIII and SalI, followed by cloning into similarly digested pUCP18 [79].

To construct the *PrhIA-mNeonGreen* transcriptional reporter fusion, 500 bp of DNA upstream of the *rhlA* gene and the DNA encoding the *mNeonGreen* open-reading frame were amplified using *P. aeruginosa* PA14 genomic DNA and the plasmid *pmNeonGreen-N1* (licensed from Allele Biotech) as templates, respectively [80]. Next, two DNA fragments of ~730 bp, one corresponding to the intergenic region ~700 bp downstream of the *P. aeruginosa* PA14\_20500 gene and the other corresponding to ~1000 bp upstream of the *P. aeruginosa* PA14\_20510 gene, were amplified from *P. aeruginosa* PA14 genomic DNA. The four DNA fragments were assembled by the Gibson method and cloned into pEXG2. The resulting plasmid was used to transform *E. coli* SM10λpir, and subsequently mobilized into *P. aeruginosa* PA14 WT and the  $\Delta$ *rhlR* and  $\Delta$ *rhlI* mutants via biparental mating as described above. The *PchiC-mNeonGreen* transcriptional reporter fusion was generated analogously to the *PrhIA-mNeonGreen* reporter fusion and integrated on the chromosome at the identical ectopic locus.

The L-arabinose inducible P<sub>BAD</sub>-*rhlR* construct was generated by inserting the DNA encoding the RhlR open reading frame between the NcoI and EcoRI sites on the pTJ1 plasmid [81]. The construct was mobilized into the  $\Delta$ *lasR*  $\Delta$ *lasI*  $\Delta$ *rhlR*  $\Delta$ *rhlI* quadruple mutant (called  $\Delta$ 4) as described previously [78]. Next, the *PrhIA-mNeonGreen* transcriptional reporter plasmid was conjugated into the  $\Delta$ 4 P<sub>BAD</sub>-*rhlR* strain as described above. To construct constitutively bioluminescent strains for mouse infections, the plasmid pUC18T-miniTn7T-*lux*-Tp was mobilized into the WT,  $\Delta$ *lasR*,  $\Delta$ *lasI*,  $\Delta$ *rhlR*, and  $\Delta$ *rhlI* mutants as described previously [82,83]. The strains and plasmids used in this study are listed in S3 Table.

## Pyocyanin assay

*P. aeruginosa* strains were grown overnight in LB liquid medium at 37°C with shaking. Cultures were back diluted 1:1000 into fresh medium and grown for 18 h. The cells were pelleted by centrifugation, and the culture fluids were passed through 0.22 µm filters into clear plastic cuvettes. The OD<sub>695</sub> of each sample was measured on a spectrophotometer (Beckman Coulter DV 730).

To quantify pyocyanin production from colony biofilms, 10 µL of culture was spotted onto 60 x 15 mm Petri plates containing 10 mL 1% Tryptone medium solidified with 1% agar. The plates were incubated at 25°C for 5 days. Pyocyanin was extracted by the addition of 5 ml chloroform to the plate, followed by a second extraction with 0.2 N HCl. The absorbance of this solution was measured on a spectrophotometer at 530 nm (Beckman Coulter DV 730). The OD<sub>520</sub> of each sample was multiplied by 17.072 to obtain the concentration of pyocyanin (µg per CFU) [84].

## Colony biofilm assay

One microliter of overnight *P. aeruginosa* cultures grown at 37°C in 1% Tryptone broth was spotted onto 60 x 15 mm Petri plates containing 10 mL 1% Tryptone medium fortified with 40 mg per L Congo red and 20 mg per L Coomassie brilliant blue dyes, and solidified with 1% agar. Colonies were grown at 25°C and images were acquired after 120 h using a Leica stereomicroscope M125 mounted with a Leica MC170 HD camera at 7.78x zoom.

## RNA-seq

*P. aeruginosa* strains were harvested from HCD planktonic cultures ( $OD_{600} = 2.0$ ) and from mature (5-day old) colony biofilms. RNA was purified using Trizol (Ambion). 0.5 µg of total RNA was subjected to rRNA-depletion using the Ribo-Zero rRNA Removal Kit (Bacteria) from Illumina, followed by library preparation using the PrepX RNA-Seq Illumina Library Kit (WaferGen Biosystems). Unique barcodes were added to each sample pool to enable multiplexing. Libraries were sequenced as single end 75 bp reads on an Illumina HiSeq 2500 instrument. Data analysis was performed on a local Galaxy platform. Reads (~10 million reads per replicate) were mapped to the *P. aeruginosa* UCBPP-PA14 genome ([www.pseudomonas.com](http://www.pseudomonas.com), [85]) using TopHat. Differentially expressed genes were identified using DESeq2. Genes showing  $\log_2$  fold-change  $>$  or  $= 2$  and adjusted P-value  $<$  or  $= 0.001$  in the mutant strains compared to WT, under the corresponding condition, are reported in this study.

## qRT-PCR

*P. aeruginosa* strains were harvested from HCD planktonic cultures ( $OD_{600} = 2.0$ ) and from mature (5-day old) colony biofilms. RNA was purified using Trizol (Ambion), and subsequently, DNase treated (TURBO DNA-free, Thermo Fisher). cDNA was synthesized using SuperScript III Reverse Transcriptase (Invitrogen) and quantified using PerfeCTa SYBR Green FastMix Low ROX (Quanta BioSciences).

## *rhIA* reporter assay

WT and mutant *P. aeruginosa* strains harboring the chromosomally encoded *PrhIA-mNeon-Green* fusion were grown overnight at 37°C. The cultures were diluted 1:1000 in 3 mL of TB medium. When required, DMSO solvent or 20% (v/v) cell-free culture fluids were added and the cultures were incubated at 37°C until the  $OD_{600}$  reached 2.0. 1 mL of culture was harvested, the supernatant was removed, and the cells were resuspended in PBS. 200 µL of culture suspension was transferred to wells of 96 well plates and fluorescence was measured using an Envision 2103 Multilabel Reader (Perkin Elmer) using the FITC filter with an excitation of 485 nM and emission of 535 nM.

## *C. elegans* fast killing assay

WT N2 worms were propagated on *E. coli* OP50 lawns on Nematode Growth Media (NGM) plates [86]. Gravid adults were allowed to lay eggs on lawns of fresh *E. coli* OP50 after which the adults were removed and the eggs were allowed to grow for 48 h (to reach the L4 stage) at 20°C prior to transfer to lawns of *P. aeruginosa* strains at 25°C on PGS plates (1% Bacto-Peptone, 1% NaCl, 1% glucose, 0.15M sorbitol, 1.7% Bacto-Agar). Nematodes were scored for survival at 4, 16, and 24 h time points (30 worms per replicate, three replicates performed). Data were plotted and SEM determined using GraphPad Prism software.



## Murine infection assays

*P. aeruginosa* strains were grown on *Pseudomonas* Isolation Agar (PIA) for 16–18 h at 37°C and suspended in PBS to an OD<sub>600</sub> of 0.5, corresponding to ~10<sup>9</sup> CFU/mL. Inocula were adjusted spectrophotometrically to obtain the desired challenge dose in a volume of 50 µL. Six-week old female Balb/c mice (Jackson Laboratories, Bar Harbor, ME) were anesthetized by i.p. injection of 0.2 mL of a mixture of ketamine (25 mg/mL) and xylazine (12 mg/mL). Mice were infected by non-invasive intratracheal instillation of dilutions of *P. aeruginosa* PA14 *PI-lux* or isogenic QS mutants as previously described [87]. Mice were observed over 5 days, and animals that succumbed to infection or appeared to be under acute distress were humanely euthanized and were included in the experiment results. To determine each LD<sub>50</sub>, groups of mice were challenged with different doses of *P. aeruginosa* PA14 or isogenic QS mutants. Four mice were tested with each dose of each strain. The percent lethality corresponding to each dose was assessed. The LD<sub>50</sub> was calculated using the method of Reed and Muench [88]. Data were analyzed by the log-rank test. All survival experiments were repeated at least three times.

For colonization of mice, *P. aeruginosa* strains were grown and prepared as described above. Six-week-old female Balb/c mice were anesthetized and infected with sublethal doses (~0.5 LD<sub>50</sub>) of *P. aeruginosa* PA14 *PI-lux* or isogenic QS mutants as described in the preceding section. Mice were euthanized at 24 and 48 h post-infection and whole lungs were collected aseptically, weighed, and homogenized in 1 mL of PBS. Tissue homogenates were serially diluted and plated on PIA and CFU determination was made 16–18 h later. Comparison of the numbers of viable bacteria obtained in lung homogenates relied on the Kruskal-Wallis test for three group analyses or the Mann-Whitney *U* test for two group analyses.

An additional group of animals was included for each *P. aeruginosa* strain examined for real time monitoring of colonization and localization of bioluminescent bacteria using an IVIS–Lumina LT III imaging system (PerkinElmer). Briefly, each group of mice was anesthetized with 3% isoflurane using an XGI-8 Gas Anesthesia System (Caliper Life Sciences), and imaged using medium binning, *f*/stop 1, subject height 1.5 cm. Images were acquired with up to 5 min exposure. Total photon emission from the ventral and dorsal sides of imaged mice was quantified using Living Image Software v4.0x (Xenogen Corp.). Due to the differences in the virulence level and resulting bacterial load, mice infected with *P. aeruginosa* PA14 *PI-lux* or isogenic QS mutants were monitored separately, but individual mice were compared at 24 and 48 h under the same conditions. All correlations were done as average radiance of photons emitted per second, area, and steradian (p/s/cm<sup>2</sup>/sr) under the chosen experimental conditions. All colonization and imaging experiments were repeated at least twice. Statistical analyses were performed using GraphPad Prism software.

## LC-MS for detection of C4-HSL

Samples were diluted 1:1 with methanol (MeOH). Synthetic C4-HSL (Sigma-Aldrich) standards were prepared in 50% MeOH. Samples and standards were loaded onto a 1 mm x 150 mm C12 column (Phenomenex, Jupiter 4 µm Proteo 90A) using a Shimadzu HPLC system and PAL auto-sampler (20 µL/injection) at a flowrate of 70 µL/min. The column was maintained at 35°C using a column oven. The column was connected inline to an electrospray source coupled to an LTQ-Orbitrap XL mass spectrometer (ThermoFisher). Caffeine (5 pM/µL in 50% Acetonitrile with 0.1% Formic Acid) was injected as a lock mass through a tee at the column outlet using a syringe pump at 10 µL/min (Harvard PHD 2000). Chromatographic separation was achieved with a linear gradient from 1% to 99% B in A in 8.5 min (A: 0.1% Formic Acid, B: 0.1% Formic Acid in Acetonitrile) with an initial 1 min hold at 1% B and followed by 5 min wash at 100% B and equilibration for 10 min with 1% B (total program was 20 min).

Electrospray ionization was achieved using a spray voltage of 4.5 kV aided by sheath gas (Nitrogen) flow rate of 12 (arbitrary units) and auxiliary gas (Nitrogen) flow rate of 1 (arbitrary units). Full scan MS data were acquired in the Orbitrap at a resolution of 60,000 in profile mode from the  $m/z$  range of 160–320. LC-MS data were manually interpreted using the Xcalibur Qual browser (Thermo, Version 2.1) to visualize C4-HSL mass spectra and to generate extracted ion chromatograms using the theoretical  $[M+H]^+$  within a range of  $\pm 2$  ppm.

## Ethics statement

All animal procedures were conducted according to the guidelines of the Emory University Institutional Animal Care and Use Committee (IACUC), under approved protocol number DAR-2003421-042219BN. The study was carried out in strict accordance with established guidelines and policies at Emory University School of Medicine, and recommendations in the Guide for Care and Use of Laboratory Animals of the National Institute of Health, as well as local, state, and federal laws.

## Supporting information

**S1 Fig. The *P. aeruginosa* colony biofilm morphology develops over time and is independent of Congo red in the assay medium.** A) Five-day time courses showing development of the colony biofilm morphologies of the WT,  $\Delta rhIR$  mutant, and  $\Delta rhII$  mutant. B) Colony biofilm morphologies of the WT,  $\Delta rhIR$  mutant transformed with the empty pUCP18 plasmid, and the  $\Delta rhIR \Delta rhII$  double mutant transformed with *rhlR* on the pUCP18 plasmid under its native promoter. C) Colony biofilm morphologies of the strains in panel A after 5 days on medium lacking the Congo red and Coomassie brilliant blue dyes. Scale bar is 2 mm. (TIF)

**S2 Fig. *P. aeruginosa*  $\Delta lasR$  and  $\Delta lasI$  mutants have identical phenotypes whereas the *rhlR*<sup>W10STOP</sup> and *rhlII*<sup>F50STOP</sup> mutants do not.** A) Pyocyanin production (OD<sub>695</sub>) in cell-free culture fluids prepared from the WT,  $\Delta lasR$ ,  $\Delta lasI$ , *rhlR*<sup>W10STOP</sup>, and *rhlII*<sup>F50STOP</sup> mutants. Error bars represent SD for three biological replicates. B) Colony biofilm phenotypes of the WT,  $\Delta lasR$  and  $\Delta lasI$  mutants. Scale bar is 2 mm. C) Colony biofilm surface area quantitation of the indicated strains over the course of 5 days. Error bars represent SEM of three independent experiments. D) Colony biofilm morphologies of the WT, *rhlR*<sup>W10STOP</sup> and *rhlII*<sup>F50STOP</sup> mutants. Scale bar is 2 mm. (TIF)

**S3 Fig. Rhamnolipids are not responsible for the distinct *P. aeruginosa*  $\Delta rhIR$  and  $\Delta rhII$  colony biofilm phenotypes.** Colony biofilm morphology of the WT and *rhlA*<sup>C11STOP</sup>,  $\Delta rhIR$  *rhlA*<sup>C11STOP</sup>, and  $\Delta rhII$  *rhlA*<sup>C11STOP</sup> mutants. Scale bar is 2 mm. (TIF)

**S4 Fig. Pyocyanin levels are elevated in  $\Delta rhII$  *P. aeruginosa* colony biofilms.** Pyocyanin levels were measured in micrograms per colony forming unit for the WT, the  $\Delta rhIR$  and  $\Delta rhII$  single mutants, and the  $\Delta rhII$   $\Delta phz$  double mutant. Error bars represent SEM of three independent replicates. (TIF)

**S5 Fig. The  $\Delta rhIR$  mutant colony biofilm morphology requires the Pel exopolysaccharide.** Colony biofilm morphology of the WT and the  $\Delta pelA$ ,  $\Delta rhIR \Delta pelA$ , and  $\Delta rhII \Delta pelA$  mutants. Scale bar is 2 mm. (TIF)

**S6 Fig. Reporter activity for RhlR-controlled class I and class II genes.** A) RhlR-directed transcription of a representative Class I gene was measured using an *mNeonGreen* transcriptional reporter fusion to the *chiC* promoter integrated at an ectopic locus on the chromosome. *PchiC-mNeonGreen* reporter activity from the WT grown to HCD in planktonic culture is set to 100%, and reporter activity is shown for the  $\Delta rhlR$  mutant,  $\Delta rhlI$  mutant,  $\Delta rhlR$  mutant complemented with the *rhlR* gene under its native promoter on pUCP18 (*prhlR*), and the  $\Delta rhlI$  mutant supplied with exogenous 10  $\mu$ M C4-HSL. Error bars represent SD for three biological replicates. B) As in A for RhlR-directed transcription of the representative Class II gene *rhlA*. Pyocyanin production and biofilm formation are used as readouts for Class III gene behavior and are shown in Fig 2A and 2B respectively, of the main text. (TIF)

**S7 Fig. PrhIA-mNeonGreen transcriptional reporter activity in WT, QS, and phenazine mutants.** A) RhlR-directed transcription was measured using an *mNeonGreen* transcriptional reporter fusion to the *rhlA* promoter integrated at an ectopic locus on the chromosome. *PrhIA-mNeonGreen* reporter activity from the WT grown to HCD in liquid culture is set to 100%, and reporter activity in the  $\Delta rhlR$ ,  $\Delta rhlI$ ,  $\Delta lasR$ ,  $\Delta lasI$ ,  $\Delta 4$  ( $\Delta rhlR \Delta rhlI \Delta lasR \Delta lasI$  quadruple mutant), and  $\Delta 4 P_{BAD-rhlR}$  strains are shown. Error bars represent SEM of three independent replicates. B) Gray bars represent *rhlA* reporter activity when *rhlR* was induced in the  $\Delta 4 P_{BAD-rhlR}$  strain with 0.1% L-arabinose in the presence of 1% DMSO (solvent control) or 10  $\mu$ M C4-HSL. The *rhlA* reporter activity was set to 100% when 10  $\mu$ M C4-HSL was added. In the cultures represented by the black bars, *PrhIA-mNeonGreen* was monitored in response to 20% (v/v) of the cell-free culture fluids prepared from the indicated strains. Error bars represent SEM for three biological replicates. (TIF)

**S8 Fig. Cell-free culture fluids from the  $\Delta rhlI$  mutant lack C4-HSL.** The total ion currents measured within 2 ppm of the predicted mass of C4-HSL are shown across the liquid chromatography gradient for 500 nM C4-HSL (top, black line), and from cell-free culture fluids prepared from 1 mL of HCD planktonic cultures of WT *P. aeruginosa* PA14 (middle, red line) and the  $\Delta rhlI$  mutant (bottom, green line). Peaks above the 10% signal-to-noise threshold are labeled with retention times (RT) and peak areas (MA). The Y-axes show the normalized values with  $4 \times 10^5$  arbitrary units set as 100% in each panel. (TIF)

**S9 Fig. The  $\Delta lasI$  and  $\Delta lasR$  mutants exhibit different phenotypes in nematode and murine infection models.** A) *C. elegans* were applied to lawns of *E. coli* OP50 (open squares), WT *P. aeruginosa* PA14 (closed diamonds),  $\Delta lasR$  mutant (closed triangles), and  $\Delta lasI$  mutant (closed circles). Error bars represent SEM of three independent replicates. B) Real-time monitoring of WT *P. aeruginosa* PA14 *PI-lux* and isogenic mutants in the acute pneumonia model. BALB/c mice infected intratracheally with WT,  $\Delta lasR$ , and  $\Delta lasI$  strains were imaged at 24 and 48 h using an IVIS CCD camera. Imaging was performed from the ventral side of representative mice while the animals were under isoflourane anesthesia. The color bars indicate the intensity of the bioluminescence output, with red and blue denoting the high and low signals, respectively. Note that the color scales on the various mouse bioluminescence imaging panels are not the same. (C) Bacterial load in lung homogenates of mice infected intratracheally with WT *P. aeruginosa* PA14 and the  $\Delta lasR$  and  $\Delta lasI$  mutants. Each symbol represents a single mouse. The data are pooled from two independent experiments. Data were analyzed using the Mann-Whitney U test. \*\*\*  $P < 0.001$  and ns means not significant. (TIF)

**S10 Fig. Phenazines are required for virulence in the nematode infection model.** *C. elegans* were applied to lawns of WT *P. aeruginosa* PA14 (closed diamonds), the  $\Delta rhlI$  mutant (closed circles), the  $\Delta phz$  mutant (open squares), and the  $\Delta rhlI \Delta phz$  mutant (open circles). Error bars represent SEM of three independent replicates.  
(TIF)

**S11 Fig. Pyocyanin production by *P. aeruginosa* PA14 WT and QS mutant strains.** A-E) WT,  $\Delta rhlR$ ,  $\Delta rhlI$ ,  $\Delta lasR$ , and  $\Delta lasI$  *P. aeruginosa* PA14 lawns, and F) *E. coli* OP50 lawn on PGS agar plates.  
(TIF)

**S1 Table. Genes controlled in *P. aeruginosa* PA14 by RhlR and RhlI in HCD planktonic culture determined by RNA-seq.**  
(DOCX)

**S2 Table. Genes controlled in *P. aeruginosa* PA14 by RhlR and RhlI in colony biofilms determined by RNA-seq.**  
(DOCX)

**S3 Table. Bacterial strains and plasmids.**  
(DOCX)

## Acknowledgments

We thank Wei Wang and the Genomics Core Facility at Princeton University for help with RNA-seq. We thank Tharan Srikumar and the Proteomics and Mass Spectrometry Core Facility at Princeton University for C4-HSL LC-MS analyses. We also thank all members of the Bassler group for thoughtful discussions.

## Author Contributions

**Conceptualization:** Sampriti Mukherjee, Dina Moustafa, Chari D. Smith, Joanna B. Goldberg, Bonnie L. Bassler.

**Data curation:** Sampriti Mukherjee, Dina Moustafa, Chari D. Smith, Joanna B. Goldberg, Bonnie L. Bassler.

**Formal analysis:** Sampriti Mukherjee, Dina Moustafa, Chari D. Smith, Joanna B. Goldberg, Bonnie L. Bassler.

**Funding acquisition:** Sampriti Mukherjee, Bonnie L. Bassler.

**Investigation:** Sampriti Mukherjee, Dina Moustafa, Chari D. Smith, Joanna B. Goldberg, Bonnie L. Bassler.

**Methodology:** Sampriti Mukherjee, Dina Moustafa, Chari D. Smith, Joanna B. Goldberg, Bonnie L. Bassler.

**Project administration:** Chari D. Smith, Joanna B. Goldberg, Bonnie L. Bassler.

**Resources:** Sampriti Mukherjee, Dina Moustafa, Joanna B. Goldberg, Bonnie L. Bassler.

**Supervision:** Chari D. Smith, Joanna B. Goldberg, Bonnie L. Bassler.

**Validation:** Sampriti Mukherjee, Dina Moustafa, Joanna B. Goldberg, Bonnie L. Bassler.

**Visualization:** Sampriti Mukherjee, Dina Moustafa, Joanna B. Goldberg, Bonnie L. Bassler.

**Writing – original draft:** Sampriti Mukherjee, Dina Moustafa, Chari D. Smith, Joanna B. Goldberg, Bonnie L. Bassler.

**Writing – review & editing:** Sampriti Mukherjee, Dina Moustafa, Chari D. Smith, Joanna B. Goldberg, Bonnie L. Bassler.

## References

1. Miller MB, Bassler BL. QUORUM SENSING IN BACTERIA. *Annu. Rev. Microbiol.* 2001. 55: 165–99. <https://doi.org/10.1146/annurev.micro.55.1.165> PMID: 11544353
2. Lazdunski AM, Ventre I, Sturgis JN. Regulatory circuits and communication in Gram-negative bacteria. *Nat. Rev. Microbiol.* 2004. 2: 581–592. <https://doi.org/10.1038/nrmicro924> PMID: 15197393
3. Waters CM, Bassler BL. QUORUM SENSING: Cell-to-Cell Communication in Bacteria. *Annu. Rev. Cell Dev. Biol.* 2005. 21: 319–346. <https://doi.org/10.1146/annurev.cellbio.21.012704.131001> PMID: 16212498
4. Papenfort K, Bassler BL. Quorum sensing signal-response systems in Gram-negative bacteria. *Nat. Rev. Microbiol.* 2016. 14: 576–88. <https://doi.org/10.1038/nrmicro.2016.89> PMID: 27510864
5. Fuqua C, Greenberg EP. Listening in on bacteria: acyl-homoserine lactone signalling. *Nat. Rev. Mol. Cell Biol.* 2002. 3: 685–695. <https://doi.org/10.1038/nrm907> PMID: 12209128
6. Zhang R, Pappas KM, Brace JL, Miller PC, Oulmassov T, Molyneaux JM, et al. Structure of a bacterial quorum-sensing transcription factor complexed with pheromone and DNA. *Nature* 2002. 417: 971–974. <https://doi.org/10.1038/nature00833> PMID: 12087407
7. Churchill MEA, Chen L. Structural basis of acyl-homoserine lactone-dependent signaling. *Chem. Rev.* 2011. 111: 68–85. <https://doi.org/10.1021/cr1000817> PMID: 21125993
8. Urbanowski ML, Lostroh CP, Greenberg EP. Reversible Acyl-Homoserine Lactone Binding to Purified *Vibrio fischeri* LuxR Protein. *J. Bacteriol.* 2004. 186: 631–637. <https://doi.org/10.1128/JB.186.3.631-637.2004> PMID: 14729687
9. Weingart CL, White CE, Liu S, Chai Y, Cho H, Tsai CS, Wei Y, Delay NR, Gronquist M.R., Eberhard A., et al. (2005). Direct binding of the quorum sensing regulator CepR of *Burkholderia cenocepacia* to two target promoters in vitro. *Mol. Microbiol.* 57, 452–467. <https://doi.org/10.1111/j.1365-2958.2005.04656.x> PMID: 15978077
10. Chai Y, Winans SC. Amino-terminal protein fusions to the TraR quorum-sensing transcription factor enhance protein stability and autoinducer-independent activity. *J. Bacteriol.* 2005; 187: 1219–1226. <https://doi.org/10.1128/JB.187.4.1219-1226.2005> PMID: 15687185
11. Rutherford ST, Bassler BL. Bacterial Quorum Sensing: Its Role in Virulence and Possibilities for Its Control. *Cold Spring Harb. Perspect. Med.* 2012; 2:a012427. <https://doi.org/10.1101/cshperspect.a012427> PMID: 23125205
12. Smith EE, Buckley DG, Wu Z, Saenphimmachak C, Hoffman LR, Miller SI, et al. Genetic adaptation by *Pseudomonas aeruginosa* to the airways of cystic fibrosis patients. *Sci. York* 2006; 103: 8487–8492.
13. Rumbaugh KP, Diggle SP, Watters CM, Ross-Gillespie A, Griffin AS, West SA. Quorum Sensing and the Social Evolution of Bacterial Virulence. *Curr. Biol.* 2009; 19: 341–345. <https://doi.org/10.1016/j.cub.2009.01.050> PMID: 19230668
14. Seed PC, Passador L, Iglewski BH. Activation of the *Pseudomonas aeruginosa lasI* gene by LasR and the *Pseudomonas* autoinducer PAI: An autoinduction regulatory hierarchy. *J. Bacteriol.* 1995; 177: 654–659. PMID: 7836299
15. Pearson JP, Passador L, Iglewski BH, Greenberg EP. A second N-acylhomoserine lactone signal produced by *Pseudomonas aeruginosa*. *Proc. Natl. Acad. Sci. U. S. A.* 1995; 92: 1490–1494. PMID: 7878006
16. Brint JM, Ohman DE. Synthesis of multiple exoproducts in *Pseudomonas aeruginosa* is under the control of RhlR-RhlI, another set of regulators in strain PAO1 with homology to the autoinducer-responsive LuxR-LuxI family. *J. Bacteriol.* 1995; 177: 7155–7163. PMID: 8522523
17. De Kievit TR, Kakai Y, Register JK, Pesci EC, Iglewski BH. Role of the *Pseudomonas aeruginosa las* and *rhl* quorum-sensing systems in *rhlI* regulation. *FEMS Microbiol. Lett.* 2002; 212: 101–106. PMID: 12076794
18. Wagner VE, Bushnell D, Passador L, Brooks AI, Iglewski BH. Microarray Analysis of *Pseudomonas aeruginosa* Quorum-Sensing Regulons: Effects of Growth Phase and Environment. *J. Bacteriol.* 2003; 185: 2080–2095. <https://doi.org/10.1128/JB.185.7.2080-2095.2003> PMID: 12644477
19. Winson MK, Camarat M, Latifi A, Foglino M, Chhabrat SRAM, Daykint M, et al. Multiple N-acyl-L-homoserine lactone signal molecules regulate production of virulence determinants and secondary metabolites in *Pseudomonas aeruginosa*. 1995; 92: 9427–9431. PMID: 7568146

20. Whiteley M, Lee KM, Greenberg EP. Identification of genes controlled by quorum sensing in *Pseudomonas aeruginosa*. Proc. Natl. Acad. Sci. U. S. A. 1999; 96: 13904–13909. PMID: [10570171](#)
21. Schuster M, Greenberg EP. Early activation of quorum sensing in *Pseudomonas aeruginosa* reveals the architecture of a complex regulon. BMC Genomics. 2007; 8: 287. <https://doi.org/10.1186/1471-2164-8-287> PMID: [17714587](#)
22. Pearson JP, Feldman M, Iglewski BH, Prince A. *Pseudomonas aeruginosa* Cell-to-Cell Signaling Is Required for Virulence in a Model of Acute Pulmonary Infection. Infect. Immun. 2000; 68: 4331–4334. PMID: [10858254](#)
23. Rumbaugh KP, Griswold JA, Hamood AN. The role of quorum sensing in the in vivo virulence of *Pseudomonas aeruginosa*. Microbes Infect. 2000; 2: 1721–1731. PMID: [11137045](#)
24. Chen G, Swem LR, Swem DL, Stauff DL, O'Loughlin CT, Jeffrey PD, et al. A Strategy for Antagonizing Quorum Sensing. Mol. Cell. 2011; 42: 199–209. <https://doi.org/10.1016/j.molcel.2011.04.003> PMID: [21504831](#)
25. LaSarre B, Federle MJ. Exploiting Quorum Sensing To Confuse Bacterial Pathogens. Microbiol. Mol. Biol. Rev. 2013; 77: 73–111. <https://doi.org/10.1128/MMBR.00046-12> PMID: [23471618](#)
26. O'Loughlin CT, Miller LC, Siryaporn A, Drescher K, Semmelhack MF, Bassler BL. A quorum-sensing inhibitor blocks *Pseudomonas aeruginosa* virulence and biofilm formation. Proc. Natl. Acad. Sci. 2013; 110: 17981–17986. <https://doi.org/10.1073/pnas.1316981110> PMID: [24143808](#)
27. Davies DG, Parsek MR, Pearson JP, Iglewski BH, Costerton JW, Greenberg EP. The Involvement of Cell-to-Cell Signals in the Development of a Bacterial Biofilm. Science. 1998; 280: 295–298. PMID: [9535661](#)
28. Friedman L, Kolter R. Genes involved in matrix formation in *Pseudomonas aeruginosa* PA14 biofilms. Mol. Microbiol. 2004; 51: 675–690. PMID: [14731271](#)
29. James GA, Swogger E, Wolcott R, Pulcini ED, Secor P, Sestrich J, et al. Biofilms in chronic wounds. Wound Repair Regen. 2008; 16: 37–44. <https://doi.org/10.1111/j.1524-475X.2007.00321.x> PMID: [18086294](#)
30. Dietrich LEP, Teal TK, Price-Whelan A, Newman DK. Redox-Active Antibiotics Control Gene Expression and Community Behavior in Divergent Bacteria. Science. 2008; 321: 1203–1206. <https://doi.org/10.1126/science.1160619> PMID: [18755976](#)
31. Dietrich LEP, Okegbe C, Price-Whelan A, Sakhtah H, Hunter RC, Newman DK. Bacterial community morphogenesis is intimately linked to the intracellular redox state. J. Bacteriol. 2013; 195: 1371–1380. <https://doi.org/10.1128/JB.02273-12> PMID: [23292774](#)
32. Colvin KM, Irie Y, Tart CS, Urbano R, Whitney JC, Ryder C, et al. The Pel and Psl polysaccharides provide *Pseudomonas aeruginosa* structural redundancy within the biofilm matrix. Environ. Microbiol. 2012; 14: 1913–1928. <https://doi.org/10.1111/j.1462-2920.2011.02657.x> PMID: [22176658](#)
33. Recinos DA, Sekedat MD, Hernandez A, Cohen TS, Sakhtah H, Prince AS, et al. Redundant phenazine operons in *Pseudomonas aeruginosa* exhibit environment-dependent expression and differential roles in pathogenicity. Proc. Natl. Acad. Sci. 2012; 109: 19420–19425. <https://doi.org/10.1073/pnas.1213901109> PMID: [23129634](#)
34. Marvig RL, Sommer LM, Molin S, Johansen HK. Convergent evolution and adaptation of *Pseudomonas aeruginosa* within patients with cystic fibrosis. Nat. Genet. 2014; 47: 1–9.
35. LaFayette SL, Houle D, Beaudoin T, Wojewodka G, Radzioch D, Hoffman LR, et al. Cystic fibrosis-adapted *Pseudomonas aeruginosa* quorum sensing *lasR* mutants cause hyperinflammatory responses. Sci. Adv. 2015; 1: 1–16.
36. Feltner JB, Wolter DJ, Pope CE, Groleau MC, Smalley NE, Greenberg EP, et al. LasR variant cystic fibrosis isolates reveal an adaptable quorum-sensing hierarchy in *Pseudomonas aeruginosa*. MBio. 2016; 7: 1–9.
37. Limmer S, Haller S, Drenkard E, Lee J, Yu S, Kocks C, Ausubel FM, Ferrandon D. *Pseudomonas aeruginosa* RhlR is required to neutralize the cellular immune response in a *Drosophila melanogaster* oral infection model. Proc. Natl. Acad. Sci. U. S. A. 2011; 108: 17378–83. <https://doi.org/10.1073/pnas.1114907108> PMID: [21987808](#)
38. Pesci EC, Pearson JP, Seed PC, Iglewski BH. Regulation of *las* and *rhl* quorum sensing in *Pseudomonas aeruginosa*. J. Bacteriol. 1997; 179: 3127–3132. PMID: [9150205](#)
39. Dekimpe V, Déziel E. Revisiting the quorum-sensing hierarchy in *Pseudomonas aeruginosa*: The transcriptional regulator RhlR regulates LasR-specific factors. Microbiology. 2009; 155: 712–723. <https://doi.org/10.1099/mic.0.022764-0> PMID: [19246742](#)
40. Høyland-Kroghsbo NM, Paczkowski J, Mukherjee S, Broniewski J, Westra E, Bondy-Denomy J, et al. Quorum sensing controls the *Pseudomonas aeruginosa* CRISPR-Cas adaptive immune system. Proc. Natl. Acad. Sci. U. S. A. 2017; 114: 201617415.

41. Paczkowski J, Mukherjee S, McCready AR, Cong JP, Aquino CJ, Kim H, et al. Flavonoids suppress *Pseudomonas aeruginosa* virulence through allosteric inhibition of quorum-sensing receptors. *J. Biol. Chem.* 2017; 292: 4064–4076. <https://doi.org/10.1074/jbc.M116.770552> PMID: 28119451
42. Monds RD, O'Toole GA. The developmental model of microbial biofilms: ten years of a paradigm up for review. *Trends Microbiol.* 2009; 17: 73–87. <https://doi.org/10.1016/j.tim.2008.11.001> PMID: 19162483
43. Ferrara S, Brugnoli M, de Bonis A, Righetti F, Delvillani F, Dehò G, et al. Comparative profiling of *Pseudomonas aeruginosa* strains reveals differential expression of novel unique and conserved small RNAs. *PLoS One.* 2012; 7.
44. Boles B.R., Thoendel M., and Singh P.K. (2005). Rhamnolipids mediate detachment of *Pseudomonas aeruginosa* from biofilms. *Mol. Microbiol.* 57, 1210–1223. <https://doi.org/10.1111/j.1365-2958.2005.04743.x> PMID: 16101996
45. Bhattacharjee A, Nusca TD, Hochbaum AI. Rhamnolipids mediate an interspecies biofilm dispersal signaling pathway. *ACS Chem. Biol.* 2016; 11: 3068–3076. <https://doi.org/10.1021/acscchembio.6b00750> PMID: 27623227
46. Soberón-Chávez G, Aguirre-Ramírez M, Sánchez R. The *Pseudomonas aeruginosa* RhlA enzyme is involved in rhamnolipid and polyhydroxyalkanoate production. *J. Ind. Microbiol. Biotechnol.* 2005; 32: 675–677. <https://doi.org/10.1007/s10295-005-0243-0> PMID: 15937697
47. Reis RS, Pereira AG, Neves BC, Freire DMG. Gene regulation of rhamnolipid production in *Pseudomonas aeruginosa*—A review. *Bioresour. Technol.* 2011; 102: 6377–6384. <https://doi.org/10.1016/j.biortech.2011.03.074> PMID: 21498076
48. Chugani S, Greenberg EP. LuxR homolog-independent gene regulation by acyl-homoserine lactones in *Pseudomonas aeruginosa*. *Proc. Natl. Acad. Sci. U. S. A.* 2010; 107: 10673–10678. <https://doi.org/10.1073/pnas.1005909107> PMID: 20498077
49. Pesci EC, Milbank JBJ, Pearson JP, McKnight S, Kende AS, Greenberg EP, et al. Quinolone signaling in the cell-to-cell communication system of *Pseudomonas aeruginosa*. *Proc. Natl. Acad. Sci.* 1999; 96: 11229–11234. PMID: 10500159
50. Yates EA, Philipp B, Buckley C, Atkinson S, Chhabra SR, Sockett RE, et al. N-Acylhomoserine Lactones Undergo Lactonolysis in a pH-, Temperature-, and Acyl Chain Length-Dependent Manner during Growth of *Yersinia pseudotuberculosis* and *Pseudomonas aeruginosa*. *J. Bacteriol.* 2002; 70: 5635–5646.
51. Tan MW, Mahajan-Miklos S, Ausubel FM. Killing of *Caenorhabditis elegans* by *Pseudomonas aeruginosa* used to model mammalian bacterial pathogenesis. *Proc. Natl. Acad. Sci. U. S. A.* 1999; 96: 715–20. PMID: 9892699
52. Lee J, Zhang L. The hierarchy quorum sensing network in *Pseudomonas aeruginosa*. *Protein Cell.* 2014; 6: 26–41. <https://doi.org/10.1007/s13238-014-0100-x> PMID: 25249263
53. Reverchon S, Bouillant ML, Salmond G, Nasser W. Integration of the quorum-sensing system in the regulatory networks controlling virulence factor synthesis in *Erwinia chrysanthemi*. *Mol. Microbiol.* 1998; 29: 1407–1418. PMID: 9781878
54. Minogue TD, Wehland-Von T M, Bernhard F, Von Bodman SB. The autoregulatory role of EsaR, a quorum-sensing regulator in *Pantoea stewartii* ssp. *stewartii*: Evidence for a repressor function. *Mol. Microbiol.* 2002; 44: 1625–1635. PMID: 12067349
55. Burr T, Barnard AML, Corbett MJ, Pemberton CL, Simpson NJL, Salmond GPC. Identification of the central quorum sensing regulator of virulence in the enteric phytopathogen, *Erwinia carotovora*: The VirR repressor. *Mol. Microbiol.* 2006; 59: 113–125. <https://doi.org/10.1111/j.1365-2958.2005.04939.x> PMID: 16359322
56. Brachmann AO, Brameyer S, Kresovic D, Hitkova I, Kopp Y, Manske C, et al. Pyrones as bacterial signaling molecules. *Nat. Chem. Biol.* 2013. 9: 573–8. <https://doi.org/10.1038/nchembio.1295> PMID: 23851573
57. Brameyer S, Kresovic D, Bode HB, Heermann R. Dialkylresorcinols as bacterial signaling molecules. *Proc. Natl. Acad. Sci.* 2015. 112: 572–577. <https://doi.org/10.1073/pnas.1417685112> PMID: 25550519
58. Hawver LA, Jung SA, Ng W. Specificity and complexity in bacterial quorum-sensing systems. *FEMS Microbiol. Rev.* 2016. 738–752. <https://doi.org/10.1093/femsre/fuw014> PMID: 27354348
59. Chandler JR, Heilmann S, Mittler JE, Greenberg EP. Acyl-homoserine lactone-dependent eavesdropping promotes competition in a laboratory co-culture model. *ISME J.* 2012. 6: 1–10. <https://doi.org/10.1038/ismej.2011.71>
60. Kim T, Duong T, Wu CA, Choi J, Lan N, Kang SW, et al. Structural insights into the molecular mechanism of *Escherichia coli* SdiA, a quorum-sensing receptor. *Acta Crystallogr. Sect. D Biol. Crystallogr.* 2014. 70: 694–707.

61. Fuqua C, Winans SC, Greenberg EP. CENSUS AND CONSENSUS IN BACTERIAL ECOSYSTEMS: The LuxR-LuxI Family of Quorum-Sensing Transcriptional Regulators. *Annu. Rev. Microbiol.* 1996. 50: 727–51. <https://doi.org/10.1146/annurev.micro.50.1.727> PMID: 8905097
62. Grosso-Becerra MV, Croda-García G, Merino E, Servín-González L, Mojica-Espinosa R, Soberón-Chávez G. Regulation of *Pseudomonas aeruginosa* virulence factors by two novel RNA thermometers. *Proc. Natl. Acad. Sci. U. S. A.* 2014. 111: 15562–7. <https://doi.org/10.1073/pnas.1402536111> PMID: 25313031
63. Moghal N, Sternberg PW. Multiple positive and negative regulators of signaling by the EGF-receptor. *Curr. Opin. Cell Biol.* 1999. 11: 190–196. PMID: 10209155
64. Wilkinson SP, Grove A. Ligand-responsive transcriptional regulation by members of the MarR family of winged helix proteins. *Curr. Issues Mol. Biol.* 2006. 8: 51–62. PMID: 16450885
65. Cezairliyan B, Vinayavekhin N, Grenfell-Lee D, Yuen GJ, Saghatelian A, Ausubel FM. Identification of *Pseudomonas aeruginosa* Phenazines that Kill *Caenorhabditis elegans*. *PLoS Pathog.* 2013. 9.
66. Zhu H, Bandara R, Conibear TC, Thuruthyil SJ, Rice SA, Kjelleberg S, et al. *Pseudomonas aeruginosa* with *lasI* quorum-sensing deficiency during corneal infection. *Invest Ophthalmol Vis Sci.* 2004. 45 (6):1897–903. PMID: 15161855
67. Tang HB, Mango EDI, Bryan R, Gambello M, Iglewski BH, Goldberg JB, et al. Contribution of Specific *Pseudomonas aeruginosa* Virulence Factors to Pathogenesis of Pneumonia in a Neonatal Mouse Model of Infection. *Infect. Immun.* 1996. 64: 37–43. PMID: 8557368
68. Lazenby JJ, Griffin PE, Kyd J, Whitchurch CB, Cooley MA. A Quadruple Knockout of *lasI*R and *rhlI*R of *Pseudomonas aeruginosa* PAO1 That Retains Wild-Type Twitching Motility Has Equivalent Infectivity and Persistence to PAO1 in a Mouse Model of Lung Infection. *PLoS One.* 2013; 8: e60973. <https://doi.org/10.1371/journal.pone.0060973> PMID: 23593362
69. Wu H, Song Z, Givskov M, Doring G, Worlitzsch D, Mathee K, Rygaard J, et al. *Pseudomonas aeruginosa* mutations in *lasI* and *rhlI* quorum sensing systems result in milder chronic lung infection. *Microbiology.* 2016; 2318: 34–1105.
70. Lau GW, Ran H, Kong F, Hassett DJ, Mavrodi D. *Pseudomonas aeruginosa* Pyocyanin Is Critical for Lung Infection in Mice. *Infect. Immun.* 2004. 72: 4275–4278. <https://doi.org/10.1128/IAI.72.7.4275-4278.2004> PMID: 15213173
71. Kukavica-ibrulj I, Bragonzi A, Paroni M, Winstanley C, O'Toole GA, Levesque RC. In Vivo Growth of *Pseudomonas aeruginosa* Strains PAO1 and PA14 and the Hypervirulent Strain LESB58 in a Rat Model of Chronic Lung Infection. *J. Bacteriol.* 2008. 190: 2804–2813. <https://doi.org/10.1128/JB.01572-07> PMID: 18083816
72. Wareham DW, Papakonstantinou A, Curtis MA. The *Pseudomonas aeruginosa* PA14 type III secretion system is expressed but not essential to virulence in the *Caenorhabditis elegans*-*P. aeruginosa* pathogenicity model. *FEMS Microbiol. Lett.* 2005. 242: 209–216. <https://doi.org/10.1016/j.femsle.2004.11.018> PMID: 15621439
73. Mah TF, Pitts B, Pellock B, Walker GC, Stewart PS, O'Toole GA. A genetic basis for *Pseudomonas aeruginosa* biofilm antibiotic resistance. *Lett. to Nat.* 2003. 426: 1–5.
74. Rice LB. Federal funding for the study of Antimicrobial Resistance in Nosocomial Pathogens: No ESKAPE. *J. Infect. Dis.* 2008. 197:1079–81. <https://doi.org/10.1086/533452> PMID: 18419525
75. Pendleton JN, Gorman SP, Gilmore BF. Clinical relevance of the ESKAPE pathogens. *Expert Rev. Anti-Infective Therapy* 2013. 11(3): 297–308. <https://doi.org/10.1586/eri.13.12> PMID: 23458769
76. Tacconelli E, Carmell Y, Harbarth S, Kahlmeter G, Kluytmans J, Mendelson M, et al. Global priority list of antibiotic-resistant bacteria to guide research, discovery, and development of new antibiotics. WHO Press Release 2017.
77. Gibson DG, Young L, Chuang R, Venter JC, Iii CAH, Smith HO, et al. Enzymatic assembly of DNA molecules up to several hundred kilobases. *Nat. Methods* 2009. 6: 12–16.
78. Hmelo LR, Borlee BR, Almlad H, Love ME, Randall TE, Tseng BS, et al. Precision-engineering the *Pseudomonas aeruginosa* genome with two-step allelic exchange. *Nat. Protoc.* 2015. 10: 1820–41. <https://doi.org/10.1038/nprot.2015.115> PMID: 26492139
79. Schweizer HP. *Escherichia-Pseudomonas* Shuttle Vectors derived from pUC18/19. *Gene* 1991. 97: 109–112 PMID: 1899844
80. Shaner NC, Lambert GG, Chammass A, Ni Y, Cranfill PJ, Baird M, et al. A bright monomeric green fluorescent protein derived from *Branchiostoma lanceolatum*. *Nat. Methods* 2013. 10: 407–409. <https://doi.org/10.1038/nmeth.2413> PMID: 23524392
81. Damron FH, Mckenney ES, Schweizer HP, Goldberg B. Construction of a Broad-Host-Range Tn 7 -Based Vector for Single- Copy P BAD -Controlled Gene Expression in Gram-Negative Bacteria. 2013. 79: 718–721.



82. Choi KH, Kumar A, Schweizer HP. A 10-min method for preparation of highly electrocompetent *Pseudomonas aeruginosa* cells: Application for DNA fragment transfer between chromosomes and plasmid transformation. *J. Microbiol. Methods* 2006. 64: 391–397. <https://doi.org/10.1016/j.mimet.2005.06.001> PMID: 15987659
83. Damron FH, McKenney ES, Barbier M, Liechti GW, Schweizer HP, Goldberg JB. Construction of mobilizable mini-Tn7 vectors for bioluminescent detection of gram-negative bacteria and single-copy promoter lux reporter analysis. *Appl. Environ. Microbiol.* 2013. 79: 4149–4153. <https://doi.org/10.1128/AEM.00640-13> PMID: 23584769
84. Essar DW, Eberly LEE, Hadero A, Crawford IP. Identification and Characterization of Genes for a Second Anthranilate Synthase in *Pseudomonas aeruginosa*: Interchangeability of the Two Anthranilate Synthases and Evolutionary Implications. 1990. 884–900. PMID: 2153661
85. Winsor GL, Griffiths EJ, Lo R, Dhillon BK, Shay JA, Brinkman FS. Enhanced annotations and features for comparing thousands of *Pseudomonas* genomes in the *Pseudomonas* genome database. *Nucleic Acids Res.* 2016. <https://doi.org/10.1093/nar/gkv1227> PMID: 26578582
86. Brenner S. The genetics of *Caenorhabditis elegans*. *Genetics.* 1974. 77: 71–94. PMID: 4366476
87. Revelli DA, Boylan JA, Gherardini FC, Bowen RA, State C. A non-invasive intratracheal inoculation method for the study of pulmonary melioidosis. *Front. Cell Infect. Microbiol.* 2012. 2: 1–8. <https://doi.org/10.3389/fcimb.2012.00001>
88. Reed LJ, Muench H. A simple method of estimating fifty percent endpoints. *Am J Hyg.* 1938. 27: 493–497.
